# Supplementary material for: New Evidence for the Bronze Age Zooarchaeology in the Inland Area of the Iberian Peninsula through the Analysis of Pista de Motos (Villaverde Bajo, Madrid)
Source: MDPI journal article supplement (doi:10.3390/ani14030413), 2024-01-26
Supplement: s1 [file s1]

1. **Supplementary Table S1. Relative chronological correspondence assigned to the Pista de Motos site.**

| SU        | Chronology             | SU  | Chronology        | SU        | Chronology        |
|-----------|------------------------|-----|-------------------|-----------|-------------------|
| 2301      | Neolithic              | 111 | Middle Bronze Age | 811       | Iron Age II       |
| 2491      | Neolithic              | 121 | Middle Bronze Age | 2071      | Iron Age II       |
| <b>SU</b> | <b>Chronology</b>      | 191 | Middle Bronze Age | 2121      | Iron Age II       |
| 431       | Bell-Beaker Bronze Age | 201 | Middle Bronze Age | 2171      | Iron Age II       |
| 481       | Bell-Beaker Bronze Age | 241 | Middle Bronze Age | 2251      | Iron Age II       |
| 571       | Bell-Beaker Bronze Age | 271 | Middle Bronze Age | 2451      | Iron Age II       |
| 573       | Bell-Beaker Bronze Age | 311 | Middle Bronze Age | 2461      | Iron Age II       |
| 681       | Bell-Beaker Bronze Age | 321 | Middle Bronze Age | 2501      | Iron Age II       |
| 691       | Bell-Beaker Bronze Age | 356 | Middle Bronze Age | 2541      | Iron Age II       |
| 721       | Bell-Beaker Bronze Age | 361 | Middle Bronze Age | 2941      | Iron Age II       |
| 1251      | Bell-Beaker Bronze Age | 391 | Middle Bronze Age | <b>SU</b> | <b>Chronology</b> |
| 1771      | Bell-Beaker Bronze Age | 451 | Middle Bronze Age | 2063      | Visigoths         |
| 1831      | Bell-Beaker Bronze Age | 461 | Middle Bronze Age | 2065      | Visigoths         |
| 2201      | Bell-Beaker Bronze Age | 471 | Middle Bronze Age | 2227      | Visigoths         |
| 2203      | Bell-Beaker Bronze Age | 501 | Middle Bronze Age | 2291      | Visigoths         |
| 2236      | Bell-Beaker Bronze Age | 591 | Middle Bronze Age | 2396      | Visigoths         |
| 2351      | Bell-Beaker Bronze Age | 601 | Middle Bronze Age | 2481      | Visigoths         |
| 2417      | Bell-Beaker Bronze Age | 611 | Middle Bronze Age | 2601      | Visigoths         |
| 2441      | Bell-Beaker Bronze Age | 621 | Middle Bronze Age | <b>SU</b> | <b>Chronology</b> |
| 2571      | Bell-Beaker Bronze Age | 631 | Middle Bronze Age | 2557      | Islamic Age       |
| 2823      | Bell-Beaker Bronze Age | 636 | Middle Bronze Age | 2565      | Islamic Age       |
| <b>SU</b> | <b>Chronology</b>      | 661 | Middle Bronze Age | 2567      | Islamic Age       |
| 101       | Prehistorian Indet     | 663 | Middle Bronze Age |           |                   |
| 131       | Prehistorian Indet     | 671 | Middle Bronze Age |           |                   |
| 141       | Prehistorian Indet     | 711 | Middle Bronze Age |           |                   |
| 151       | Prehistorian Indet     | 751 | Middle Bronze Age |           |                   |
| 161       | Prehistorian Indet     | 761 | Middle Bronze Age |           |                   |
| 171       | Prehistorian Indet     | 781 | Middle Bronze Age |           |                   |

|     |                     |         |                   |  |  |
|-----|---------------------|---------|-------------------|--|--|
| 181 | Prehistorian Indet  | 791     | Middle Bronze Age |  |  |
| 196 | Prehistorian Indet  | 801     | Middle Bronze Age |  |  |
| 211 | Prehistorian Indet  | 821     | Middle Bronze Age |  |  |
| 221 | Prehistorian Indet  | 826     | Middle Bronze Age |  |  |
| 231 | Prehistorian Indet  | 831     | Middle Bronze Age |  |  |
| 251 | Prehistorian Indet  | 841     | Middle Bronze Age |  |  |
| 256 | Prehistorian Indet  | 851     | Middle Bronze Age |  |  |
| 261 | Prehistorian Indet  | 854     | Middle Bronze Age |  |  |
| 281 | Prehistorian Indet  | 856     | Middle Bronze Age |  |  |
| 291 | Prehistorian Indet  | 857     | Middle Bronze Age |  |  |
| 331 | Prehistorian Indet  | 870     | Middle Bronze Age |  |  |
| 341 | Prehistorian Indet  | 872     | Middle Bronze Age |  |  |
| 351 | Prehistorian Indet  | 873     | Middle Bronze Age |  |  |
| 371 | Prehistorian Indet  | 876     | Middle Bronze Age |  |  |
| 381 | Prehistorian Indet  | 878     | Middle Bronze Age |  |  |
| 411 | Prehistorian Indet  | 881     | Middle Bronze Age |  |  |
| 421 | Prehistorian Indet  | 886     | Middle Bronze Age |  |  |
| 441 | Prehistorian Indet  | 901-902 | Middle Bronze Age |  |  |
| 476 | Prehistorian Indet  | 911     | Middle Bronze Age |  |  |
| 491 | Prehistorian Indet  | 921     | Middle Bronze Age |  |  |
| 511 | Prehistorian Indet  | 931     | Middle Bronze Age |  |  |
| 521 | Prehistorian Indet  | 941     | Middle Bronze Age |  |  |
| 531 | Middle Bronze Age ? | 951     | Middle Bronze Age |  |  |
| 541 | Prehistorian Indet  | 961     | Middle Bronze Age |  |  |
| 551 | Prehistorian Indet  | 963     | Middle Bronze Age |  |  |
| 676 | Prehistorian Indet  | 971     | Middle Bronze Age |  |  |
| 701 | Prehistorian Indet  | 981     | Middle Bronze Age |  |  |
| 702 | Prehistorian Indet  | 991     | Middle Bronze Age |  |  |
| 713 | Prehistorian Indet  | 1001    | Middle Bronze Age |  |  |
| 723 | Prehistorian Indet  | 1011    | Middle Bronze Age |  |  |
| 731 | Prehistorian Indet  | 1016    | Middle Bronze Age |  |  |

|      |                    |      |                   |  |  |
|------|--------------------|------|-------------------|--|--|
| 741  | Prehistorian Indet | 1021 | Middle Bronze Age |  |  |
| 771  | Prehistorian Indet | 1031 | Middle Bronze Age |  |  |
| 859  | Prehistorian Indet | 1041 | Middle Bronze Age |  |  |
| 861  | Prehistorian Indet | 1061 | Middle Bronze Age |  |  |
| 1018 | Prehistorian Indet | 1081 | Middle Bronze Age |  |  |
| 1071 | Prehistorian Indet | 1091 | Middle Bronze Age |  |  |
| 1121 | Prehistorian Indet | 1101 | Middle Bronze Age |  |  |
| 1131 | Prehistorian Indet | 1111 | Middle Bronze Age |  |  |
| 1191 | Prehistorian Indet | 1161 | Middle Bronze Age |  |  |
| 1211 | Prehistorian Indet | 1666 | Middle Bronze Age |  |  |
| 1256 | Prehistorian Indet | 1171 | Middle Bronze Age |  |  |
| 1261 | Prehistorian Indet | 1181 | Middle Bronze Age |  |  |
| 1271 | Prehistorian Indet | 1201 | Middle Bronze Age |  |  |
| 1281 | Prehistorian Indet | 1202 | Middle Bronze Age |  |  |
| 1301 | Prehistorian Indet | 1204 | Middle Bronze Age |  |  |
| 1306 | Prehistorian Indet | 1221 | Middle Bronze Age |  |  |
| 1323 | Prehistorian Indet | 1222 | Middle Bronze Age |  |  |
| 1401 | Prehistorian Indet | 1231 | Middle Bronze Age |  |  |
| 1402 | Prehistorian Indet | 1241 | Middle Bronze Age |  |  |
| 1421 | Prehistorian Indet | 1291 | Middle Bronze Age |  |  |
| 1491 | Prehistorian Indet | 1311 | Middle Bronze Age |  |  |
| 1511 | Prehistorian Indet | 1321 | Middle Bronze Age |  |  |
| 1531 | Prehistorian Indet | 1331 | Middle Bronze Age |  |  |
| 1571 | Prehistorian Indet | 1336 | Middle Bronze Age |  |  |
| 1581 | Prehistorian Indet | 1341 | Middle Bronze Age |  |  |
| 1611 | Prehistorian Indet | 1351 | Middle Bronze Age |  |  |
| 1631 | Prehistorian Indet | 1361 | Middle Bronze Age |  |  |
| 1671 | Prehistorian Indet | 1371 | Middle Bronze Age |  |  |
| 1681 | Prehistorian Indet | 1381 | Middle Bronze Age |  |  |
| 1736 | Prehistorian Indet | 1391 | Middle Bronze Age |  |  |
| 1741 | Prehistorian Indet | 1403 | Middle Bronze Age |  |  |

|      |                    |         |                   |  |  |
|------|--------------------|---------|-------------------|--|--|
| 1751 | Prehistorian Indet | 1411    | Middle Bronze Age |  |  |
| 1752 | Prehistorian Indet | 1423    | Middle Bronze Age |  |  |
| 1761 | Prehistorian Indet | 1431    | Middle Bronze Age |  |  |
| 1781 | Prehistorian Indet | 1436    | Middle Bronze Age |  |  |
| 1796 | Prehistorian Indet | 1441    | Middle Bronze Age |  |  |
| 1811 | Prehistorian Indet | 1451    | Middle Bronze Age |  |  |
| 1881 | Prehistorian Indet | 1461    | Middle Bronze Age |  |  |
| 1893 | Prehistorian Indet | 1470    | Middle Bronze Age |  |  |
| 1895 | Prehistorian Indet | 1470-76 | Middle Bronze Age |  |  |
| 1897 | Prehistorian Indet | 1476    | Middle Bronze Age |  |  |
| 1901 | Prehistorian Indet | 1478    | Middle Bronze Age |  |  |
| 1903 | Prehistorian Indet | 1481    | Middle Bronze Age |  |  |
| 1941 | Prehistorian Indet | 1501    | Middle Bronze Age |  |  |
| 1954 | Prehistorian Indet | 1521    | Middle Bronze Age |  |  |
| 1971 | Prehistorian Indet | 1541    | Middle Bronze Age |  |  |
| 2031 | Prehistorian Indet | 1551    | Middle Bronze Age |  |  |
| 2111 | Prehistorian Indet | 1561    | Middle Bronze Age |  |  |
| 2141 | Prehistorian Indet | 1591    | Middle Bronze Age |  |  |
| 2151 | Prehistorian Indet | 1601    | Middle Bronze Age |  |  |
| 2156 | Prehistorian Indet | 1621    | Middle Bronze Age |  |  |
| 2211 | Prehistorian Indet | 1641    | Middle Bronze Age |  |  |
| 2221 | Prehistorian Indet | 1651    | Middle Bronze Age |  |  |
| 2231 | Prehistorian Indet | 1661    | Middle Bronze Age |  |  |
| 2281 | Prehistorian Indet | 1665    | Middle Bronze Age |  |  |
| 2311 | Prehistorian Indet | 1691    | Middle Bronze Age |  |  |
| 2321 | Prehistorian Indet | 1701    | Middle Bronze Age |  |  |
| 2326 | Prehistorian Indet | 1711    | Middle Bronze Age |  |  |
| 2401 | Prehistorian Indet | 1731    | Middle Bronze Age |  |  |
| 2414 | Prehistorian Indet | 1791    | Middle Bronze Age |  |  |
| 2431 | Prehistorian Indet | 1821    | Middle Bronze Age |  |  |
| 2511 | Prehistorian Indet | 1836    | Middle Bronze Age |  |  |

|      |                    |      |                   |  |  |
|------|--------------------|------|-------------------|--|--|
| 2555 | Prehistorian Indet | 1841 | Middle Bronze Age |  |  |
| 2561 | Prehistorian Indet | 1851 | Middle Bronze Age |  |  |
| 2611 | Prehistorian Indet | 1861 | Middle Bronze Age |  |  |
| 2621 | Prehistorian Indet | 1871 | Middle Bronze Age |  |  |
| 2651 | Prehistorian Indet | 1891 | Middle Bronze Age |  |  |
| 2652 | Prehistorian Indet | 1921 | Middle Bronze Age |  |  |
| 2653 | Prehistorian Indet | 1923 | Middle Bronze Age |  |  |
| 2666 | Prehistorian Indet | 1931 | Middle Bronze Age |  |  |
| 2671 | Prehistorian Indet | 1951 | Middle Bronze Age |  |  |
| 2701 | Prehistorian Indet | 1952 | Middle Bronze Age |  |  |
| 2721 | Prehistorian Indet | 1961 | Middle Bronze Age |  |  |
| 2742 | Prehistorian Indet | 1976 | Middle Bronze Age |  |  |
| 2743 | Prehistorian Indet | 1981 | Middle Bronze Age |  |  |
| 2745 | Prehistorian Indet | 1991 | Middle Bronze Age |  |  |
| 2751 | Prehistorian Indet | 2001 | Middle Bronze Age |  |  |
| 2776 | Prehistorian Indet | 2011 | Middle Bronze Age |  |  |
| 2781 | Prehistorian Indet | 2051 | Middle Bronze Age |  |  |
| 2782 | Prehistorian Indet | 2081 | Middle Bronze Age |  |  |
| 2791 | Prehistorian Indet | 2091 | Middle Bronze Age |  |  |
| 2796 | Prehistorian Indet | 2101 | Middle Bronze Age |  |  |
| 2799 | Prehistorian Indet | 2131 | Middle Bronze Age |  |  |
| 2801 | Prehistorian Indet | 2136 | Middle Bronze Age |  |  |
| 2831 | Prehistorian Indet | 2161 | Middle Bronze Age |  |  |
| 2851 | Prehistorian Indet | 2181 | Middle Bronze Age |  |  |
| 2861 | Prehistorian Indet | 2223 | Middle Bronze Age |  |  |
| 2881 | Prehistorian Indet | 2261 | Middle Bronze Age |  |  |
| 2913 | Prehistorian Indet | 2271 | Middle Bronze Age |  |  |
| 2931 | Prehistorian Indet | 2331 | Middle Bronze Age |  |  |
| 2951 | Prehistorian Indet | 2341 | Middle Bronze Age |  |  |
| 2971 | Prehistorian Indet | 2361 | Middle Bronze Age |  |  |
| 2981 | Prehistorian Indet | 2371 | Middle Bronze Age |  |  |

|      |                    |      |                   |  |  |
|------|--------------------|------|-------------------|--|--|
| 3181 | Prehistorian Indet | 2381 | Middle Bronze Age |  |  |
| 3201 | Prehistorian Indet | 2391 | Middle Bronze Age |  |  |
|      |                    | 2411 | Middle Bronze Age |  |  |
|      |                    | 2421 | Middle Bronze Age |  |  |
|      |                    | 2466 | Middle Bronze Age |  |  |
|      |                    | 2471 | Middle Bronze Age |  |  |
|      |                    | 2521 | Middle Bronze Age |  |  |
|      |                    | 2551 | Middle Bronze Age |  |  |
|      |                    | 2553 | Middle Bronze Age |  |  |
|      |                    | 2581 | Middle Bronze Age |  |  |
|      |                    | 2591 | Middle Bronze Age |  |  |
|      |                    | 2631 | Middle Bronze Age |  |  |
|      |                    | 2641 | Middle Bronze Age |  |  |
|      |                    | 2660 | Middle Bronze Age |  |  |
|      |                    | 2662 | Middle Bronze Age |  |  |
|      |                    | 2664 | Middle Bronze Age |  |  |
|      |                    | 2681 | Middle Bronze Age |  |  |
|      |                    | 2691 | Middle Bronze Age |  |  |
|      |                    | 2692 | Middle Bronze Age |  |  |
|      |                    | 2693 | Middle Bronze Age |  |  |
|      |                    | 2711 | Middle Bronze Age |  |  |
|      |                    | 2731 | Middle Bronze Age |  |  |
|      |                    | 2761 | Middle Bronze Age |  |  |
|      |                    | 2771 | Middle Bronze Age |  |  |
|      |                    | 2792 | Middle Bronze Age |  |  |
|      |                    | 2811 | Middle Bronze Age |  |  |
|      |                    | 2821 | Middle Bronze Age |  |  |
|      |                    | 2836 | Middle Bronze Age |  |  |
|      |                    | 2871 | Middle Bronze Age |  |  |
|      |                    | 2891 | Middle Bronze Age |  |  |
|      |                    | 2911 | Middle Bronze Age |  |  |

|  |  |      |                   |  |  |
|--|--|------|-------------------|--|--|
|  |  | 2921 | Middle Bronze Age |  |  |
|  |  | 3001 | Middle Bronze Age |  |  |
|  |  | 3011 | Middle Bronze Age |  |  |
|  |  | 3021 | Middle Bronze Age |  |  |
|  |  | 3031 | Middle Bronze Age |  |  |
|  |  | 3036 | Middle Bronze Age |  |  |
|  |  | 3041 | Middle Bronze Age |  |  |
|  |  | 3051 | Middle Bronze Age |  |  |
|  |  | 3052 | Middle Bronze Age |  |  |
|  |  | 3061 | Middle Bronze Age |  |  |
|  |  | 3071 | Middle Bronze Age |  |  |
|  |  | 3081 | Middle Bronze Age |  |  |
|  |  | 3082 | Middle Bronze Age |  |  |
|  |  | 3091 | Middle Bronze Age |  |  |
|  |  | 3096 | Middle Bronze Age |  |  |
|  |  | 3098 | Middle Bronze Age |  |  |
|  |  | 3101 | Middle Bronze Age |  |  |
|  |  | 3111 | Middle Bronze Age |  |  |
|  |  | 3121 | Middle Bronze Age |  |  |
|  |  | 3131 | Middle Bronze Age |  |  |
|  |  | 3136 | Middle Bronze Age |  |  |
|  |  | 3141 | Middle Bronze Age |  |  |
|  |  | 3151 | Middle Bronze Age |  |  |
|  |  | 3161 | Middle Bronze Age |  |  |
|  |  | 3171 | Middle Bronze Age |  |  |
|  |  | 3191 | Middle Bronze Age |  |  |
|  |  | 3196 | Middle Bronze Age |  |  |
|  |  | 3198 | Middle Bronze Age |  |  |
|  |  | 3211 | Middle Bronze Age |  |  |





## 2. Supplementary Table S2. Taxonomical Representation in NISP According to SU.

[illegible]

[illegible]

|      |     |  |   |   |    |    |    |  |   |   |  |     |  |  |     |  |  |    |  |  |    |     |
|------|-----|--|---|---|----|----|----|--|---|---|--|-----|--|--|-----|--|--|----|--|--|----|-----|
| 1311 |     |  |   |   |    | 1  |    |  |   |   |  | 6   |  |  |     |  |  |    |  |  |    | 7   |
| 1321 | 2   |  |   |   |    |    |    |  |   |   |  | 20  |  |  |     |  |  |    |  |  |    | 22  |
| 1323 |     |  | 1 |   | 1  | 2  |    |  |   |   |  | 3   |  |  |     |  |  |    |  |  |    | 7   |
| 1331 | 14  |  | 2 |   | 28 |    | 39 |  |   | 4 |  | 80  |  |  | 18  |  |  |    |  |  | 80 | 265 |
| 1336 | 71  |  | 4 |   | 88 | 2  | 7  |  |   | 2 |  | 176 |  |  | 221 |  |  |    |  |  | 2  | 573 |
| 1341 | 4   |  |   | 1 | 4  | 13 |    |  |   |   |  | 9   |  |  |     |  |  |    |  |  |    | 31  |
| 1351 | 33  |  |   |   | 7  |    |    |  |   |   |  | 5   |  |  | 6   |  |  |    |  |  |    | 51  |
| 1361 | 129 |  |   | 1 | 4  |    |    |  | 1 |   |  | 70  |  |  | 43  |  |  | 28 |  |  |    | 276 |
| 1371 |     |  |   |   |    |    |    |  |   |   |  |     |  |  | 5   |  |  |    |  |  |    | 5   |
| 1381 | 1   |  |   |   |    |    |    |  |   |   |  |     |  |  | 1   |  |  |    |  |  |    | 2   |
| 1391 | 1   |  |   |   | 3  |    |    |  |   |   |  | 2   |  |  |     |  |  |    |  |  |    | 6   |
| 1401 |     |  |   |   | 1  |    |    |  |   |   |  |     |  |  | 7   |  |  |    |  |  |    | 8   |
| 1402 | 1   |  |   |   |    |    |    |  |   |   |  |     |  |  |     |  |  |    |  |  |    | 1   |
| 141  |     |  |   |   | 1  |    |    |  |   |   |  |     |  |  | 3   |  |  |    |  |  |    | 4   |
| 1411 |     |  |   |   | 5  |    |    |  |   |   |  | 2   |  |  | 5   |  |  |    |  |  |    | 12  |
| 1423 | 8   |  |   |   | 1  |    | 2  |  |   |   |  | 9   |  |  |     |  |  |    |  |  |    | 20  |
| 1431 | 24  |  |   |   | 1  |    | 3  |  |   |   |  | 12  |  |  |     |  |  |    |  |  |    | 40  |
| 1436 | 2   |  |   |   | 5  |    |    |  |   |   |  | 9   |  |  | 5   |  |  |    |  |  |    | 21  |
| 1441 | 8   |  |   |   | 10 |    |    |  |   |   |  | 7   |  |  | 6   |  |  |    |  |  |    | 31  |

|      |    |   |   |   |    |    |     |  |  |   |  |    |   |  |    |  |  |  |  |  |   |     |
|------|----|---|---|---|----|----|-----|--|--|---|--|----|---|--|----|--|--|--|--|--|---|-----|
| 1451 |    |   |   |   | 10 |    |     |  |  |   |  |    |   |  | 14 |  |  |  |  |  |   | 24  |
| 1461 | 28 |   |   |   |    |    | 120 |  |  |   |  | 4  |   |  | 20 |  |  |  |  |  | 6 | 178 |
| 1470 | 4  |   |   |   | 4  | 12 |     |  |  |   |  | 5  |   |  |    |  |  |  |  |  |   | 25  |
| 1476 | 2  |   | 1 |   | 4  | 1  | 5   |  |  |   |  | 2  |   |  |    |  |  |  |  |  | 3 | 18  |
| 1501 |    |   |   |   | 2  |    | 2   |  |  |   |  |    |   |  | 5  |  |  |  |  |  |   | 9   |
| 1511 |    |   |   |   |    |    | 1   |  |  |   |  | 5  |   |  |    |  |  |  |  |  |   | 6   |
| 1521 |    |   |   |   |    |    |     |  |  |   |  |    | 6 |  |    |  |  |  |  |  |   | 6   |
| 1531 | 1  |   |   |   |    |    |     |  |  |   |  |    |   |  |    |  |  |  |  |  |   | 1   |
| 1541 | 3  |   |   |   |    | 1  | 1   |  |  |   |  | 8  |   |  | 10 |  |  |  |  |  |   | 23  |
| 1551 | 1  |   |   |   | 1  |    |     |  |  |   |  | 2  |   |  |    |  |  |  |  |  |   | 4   |
| 1561 | 3  |   |   |   |    | 1  |     |  |  | 1 |  | 11 |   |  |    |  |  |  |  |  |   | 16  |
| 1581 | 4  |   |   |   | 4  |    |     |  |  |   |  |    |   |  | 8  |  |  |  |  |  |   | 16  |
| 1591 |    |   |   |   |    |    |     |  |  |   |  |    |   |  | 1  |  |  |  |  |  |   | 1   |
| 1601 | 4  | 4 |   | 5 | 4  |    |     |  |  |   |  | 1  |   |  | 4  |  |  |  |  |  |   | 22  |
| 1611 | 1  |   |   |   |    |    |     |  |  |   |  |    |   |  |    |  |  |  |  |  |   | 1   |
| 1621 | 2  |   |   |   | 2  |    |     |  |  | 1 |  |    |   |  |    |  |  |  |  |  |   | 5   |
| 1641 | 7  |   |   | 2 | 6  |    |     |  |  |   |  | 4  |   |  |    |  |  |  |  |  |   | 19  |
| 1651 |    |   |   |   |    |    |     |  |  |   |  | 4  |   |  | 5  |  |  |  |  |  | 4 | 13  |
| 1661 | 2  |   |   |   |    | 31 | 3   |  |  |   |  | 1  |   |  | 2  |  |  |  |  |  | 7 | 46  |

[illegible]

[illegible]

[illegible]

|      |    |   |   |   |    |    |    |   |  |   |   |    |   |   |    |   |  |  |  |    |    |     |
|------|----|---|---|---|----|----|----|---|--|---|---|----|---|---|----|---|--|--|--|----|----|-----|
| 2221 |    |   | 4 |   |    |    |    |   |  |   |   |    |   |   |    |   |  |  |  |    |    | 4   |
| 2223 | 5  |   |   | 6 |    | 35 |    |   |  |   |   |    |   |   |    |   |  |  |  |    |    | 46  |
| 2227 | 1  |   |   |   | 1  |    |    |   |  |   |   | 2  |   |   |    |   |  |  |  |    | 4  | 8   |
| 2236 | 7  | 6 | 1 |   | 1  | 1  | 3  |   |  |   | 1 | 43 |   | 1 |    |   |  |  |  |    |    | 64  |
| 2251 |    |   | 1 |   | 2  |    |    |   |  |   |   |    |   |   | 5  |   |  |  |  | 18 |    | 26  |
| 2261 | 5  |   | 4 |   | 1  |    |    |   |  |   |   |    |   |   |    |   |  |  |  |    |    | 10  |
| 2262 | 3  |   |   |   | 12 |    |    |   |  |   |   | 2  |   |   |    |   |  |  |  |    |    | 17  |
| 2271 |    |   |   | 6 | 9  |    | 2  |   |  |   |   | 3  |   |   |    | 1 |  |  |  |    |    | 21  |
| 2281 | 2  |   |   |   |    |    |    |   |  |   |   |    |   |   |    |   |  |  |  |    |    | 2   |
| 2301 | 2  |   |   | 1 | 2  |    |    |   |  |   |   | 8  |   |   | 7  |   |  |  |  |    |    | 20  |
| 2321 |    |   |   |   |    |    |    |   |  |   |   | 4  |   |   |    |   |  |  |  |    |    | 4   |
| 2331 | 7  |   |   |   | 9  |    | 2  |   |  |   |   | 14 |   |   | 14 |   |  |  |  |    |    | 46  |
| 2341 | 3  |   |   |   | 2  |    |    |   |  |   |   | 3  |   |   | 3  |   |  |  |  |    |    | 11  |
| 2361 |    |   |   |   | 2  |    |    |   |  |   |   | 1  |   |   | 3  |   |  |  |  |    |    | 6   |
| 2371 | 5  |   |   | 1 | 10 | 3  | 23 |   |  | 4 |   | 17 |   |   | 20 |   |  |  |  |    | 42 | 125 |
| 2381 | 6  |   |   |   | 2  |    | 1  |   |  |   |   | 3  |   |   |    |   |  |  |  |    |    | 12  |
| 2391 | 55 | 4 |   |   | 13 |    | 48 | 8 |  |   | 1 | 74 |   |   |    |   |  |  |  |    | 10 | 213 |
| 2396 | 13 |   |   | 1 | 11 |    | 12 |   |  | 1 |   | 2  | 1 |   | 31 |   |  |  |  |    |    | 72  |
| 2401 | 1  |   |   |   |    |    |    |   |  |   |   | 1  |   |   | 2  |   |  |  |  |    |    | 4   |



|      |    |   |   |   |    |   |   |  |  |   |   |    |   |  |    |  |  |  |  |  |    |     |
|------|----|---|---|---|----|---|---|--|--|---|---|----|---|--|----|--|--|--|--|--|----|-----|
| 241  | 2  |   |   |   |    |   |   |  |  |   |   |    |   |  |    |  |  |  |  |  | 6  | 8   |
| 2411 | 10 |   |   | 1 | 7  | 4 | 1 |  |  | 3 |   | 3  |   |  | 20 |  |  |  |  |  |    | 49  |
| 2414 |    |   |   |   | 4  |   |   |  |  |   |   |    |   |  |    |  |  |  |  |  |    | 4   |
| 2417 | 6  | 3 | 1 | 1 | 20 |   |   |  |  |   |   | 64 |   |  | 1  |  |  |  |  |  | 15 | 111 |
| 2420 | 4  |   |   |   | 2  |   |   |  |  |   |   | 8  |   |  |    |  |  |  |  |  |    | 14  |
| 2441 | 18 |   |   |   | 5  |   |   |  |  |   |   | 2  |   |  |    |  |  |  |  |  |    | 25  |
| 2451 |    |   |   |   |    |   |   |  |  |   |   |    |   |  | 2  |  |  |  |  |  |    | 2   |
| 2461 | 1  |   | 6 |   | 1  |   |   |  |  | 1 |   | 5  |   |  | 3  |  |  |  |  |  |    | 17  |
| 2466 |    |   |   |   | 2  |   |   |  |  |   |   |    | 1 |  |    |  |  |  |  |  | 3  | 6   |
| 2491 | 1  |   |   |   | 4  |   |   |  |  |   |   |    |   |  | 11 |  |  |  |  |  |    | 16  |
| 251  |    |   |   |   |    |   |   |  |  |   |   |    |   |  | 4  |  |  |  |  |  |    | 4   |
| 2521 | 2  |   |   |   | 12 |   |   |  |  | 2 | 1 | 1  |   |  | 23 |  |  |  |  |  |    | 41  |
| 2540 |    |   |   |   |    |   |   |  |  |   |   |    |   |  | 1  |  |  |  |  |  |    | 1   |
| 2551 | 6  |   |   | 3 | 12 |   |   |  |  |   |   | 2  |   |  | 5  |  |  |  |  |  |    | 28  |
| 2553 | 9  |   |   |   | 1  | 4 | 1 |  |  |   |   |    |   |  |    |  |  |  |  |  |    | 15  |
| 2557 |    |   |   |   | 1  |   |   |  |  |   |   |    |   |  | 4  |  |  |  |  |  |    | 5   |
| 2561 | 3  |   | 2 |   | 12 |   |   |  |  |   |   | 4  |   |  |    |  |  |  |  |  | 4  | 25  |
| 2565 |    |   |   |   |    |   |   |  |  |   |   | 1  |   |  |    |  |  |  |  |  |    | 1   |
| 2581 | 4  |   |   |   | 9  | 2 |   |  |  |   |   | 9  |   |  | 7  |  |  |  |  |  |    | 31  |

[illegible]

|      |    |   |   |   |   |   |   |   |  |   |  |    |  |  |   |   |  |  |  |  |   |    |
|------|----|---|---|---|---|---|---|---|--|---|--|----|--|--|---|---|--|--|--|--|---|----|
| 2743 |    |   |   |   |   |   |   |   |  |   |  |    |  |  | 1 |   |  |  |  |  |   | 1  |
| 2745 |    |   |   |   |   |   |   |   |  |   |  | 7  |  |  |   |   |  |  |  |  |   | 7  |
| 2351 | 75 |   |   |   |   |   |   |   |  | 1 |  | 11 |  |  |   |   |  |  |  |  |   | 87 |
| 2761 | 4  |   | 2 |   | 1 | 1 |   |   |  | 1 |  | 2  |  |  |   | 3 |  |  |  |  |   | 14 |
| 2776 |    |   |   |   | 1 |   | 4 |   |  |   |  |    |  |  |   | 1 |  |  |  |  |   | 6  |
| 2796 | 5  |   |   |   | 3 |   | 3 |   |  | 1 |  | 5  |  |  |   |   |  |  |  |  |   | 17 |
| 2799 |    | 1 |   |   |   |   |   |   |  |   |  |    |  |  |   |   |  |  |  |  |   | 1  |
| 2811 | 1  |   |   |   | 6 |   |   |   |  | 2 |  | 8  |  |  |   |   |  |  |  |  |   | 17 |
| 2821 |    |   |   | 1 | 1 |   |   |   |  | 1 |  | 13 |  |  |   |   |  |  |  |  | 7 | 23 |
| 2823 |    | 2 |   | 1 | 2 |   |   | 2 |  | 7 |  | 1  |  |  |   | 1 |  |  |  |  |   | 16 |
| 2831 |    |   |   |   |   |   |   |   |  |   |  | 1  |  |  |   |   |  |  |  |  |   | 1  |
| 2841 | 2  | 3 |   |   |   |   | 2 |   |  |   |  | 4  |  |  |   |   |  |  |  |  | 3 | 14 |
| 2851 |    |   |   |   |   |   |   |   |  |   |  | 1  |  |  |   |   |  |  |  |  | 4 | 5  |
| 2861 |    | 1 |   |   |   |   |   |   |  |   |  |    |  |  |   |   |  |  |  |  |   | 1  |
| 2871 | 3  |   | 1 | 1 | 8 |   |   |   |  | 1 |  | 1  |  |  |   | 7 |  |  |  |  |   | 22 |
| 2881 |    |   |   |   | 2 |   |   |   |  |   |  | 1  |  |  |   |   |  |  |  |  | 2 | 5  |
| 291  | 1  |   |   |   | 1 |   |   |   |  |   |  | 1  |  |  |   |   |  |  |  |  |   | 3  |
| 2911 |    |   | 1 |   | 2 |   |   |   |  |   |  | 9  |  |  |   | 5 |  |  |  |  |   | 17 |
| 2921 | 10 |   | 3 |   | 4 | 1 |   |   |  |   |  | 12 |  |  |   | 1 |  |  |  |  |   | 31 |

[illegible]

|      |     |  |   |   |    |   |    |  |  |   |  |    |  |  |   |  |  |  |  |   |  |     |
|------|-----|--|---|---|----|---|----|--|--|---|--|----|--|--|---|--|--|--|--|---|--|-----|
| 310  | 1   |  |   |   |    |   |    |  |  |   |  |    |  |  | 1 |  |  |  |  |   |  | 2   |
| 3101 | 19  |  |   | 1 | 28 |   | 11 |  |  |   |  | 3  |  |  |   |  |  |  |  |   |  | 62  |
| 3111 |     |  |   |   |    | 1 |    |  |  |   |  | 6  |  |  | 4 |  |  |  |  |   |  | 11  |
| 3121 | 14  |  |   |   |    |   |    |  |  |   |  | 12 |  |  |   |  |  |  |  |   |  | 26  |
| 3131 | 6   |  |   |   |    |   |    |  |  |   |  | 4  |  |  | 4 |  |  |  |  |   |  | 14  |
| 3136 | 6   |  | 7 |   | 7  |   |    |  |  |   |  | 2  |  |  | 1 |  |  |  |  |   |  | 23  |
| 3141 | 2   |  |   |   | 1  | 1 | 6  |  |  |   |  | 19 |  |  |   |  |  |  |  | 5 |  | 34  |
| 3151 | 1   |  |   | 1 | 1  |   |    |  |  |   |  | 4  |  |  | 3 |  |  |  |  |   |  | 10  |
| 3161 |     |  |   |   | 1  |   |    |  |  |   |  |    |  |  |   |  |  |  |  |   |  | 1   |
| 3171 | 149 |  | 1 |   | 4  |   | 1  |  |  |   |  |    |  |  |   |  |  |  |  |   |  | 155 |
| 3181 |     |  |   |   |    |   |    |  |  |   |  | 5  |  |  |   |  |  |  |  |   |  | 5   |
| 3191 |     |  |   |   | 1  | 5 |    |  |  |   |  | 1  |  |  | 1 |  |  |  |  |   |  | 8   |
| 3196 | 1   |  |   |   |    |   |    |  |  |   |  | 1  |  |  | 3 |  |  |  |  |   |  | 5   |
| 3198 |     |  |   |   | 5  |   |    |  |  |   |  |    |  |  |   |  |  |  |  | 2 |  | 7   |
| 3201 |     |  |   |   | 1  |   |    |  |  | 1 |  |    |  |  |   |  |  |  |  |   |  | 2   |
| 3211 | 2   |  |   |   |    |   |    |  |  |   |  | 4  |  |  | 2 |  |  |  |  |   |  | 8   |
| 351  | 3   |  |   |   |    |   | 1  |  |  |   |  |    |  |  |   |  |  |  |  | 1 |  | 5   |
| 356  | 12  |  |   |   |    |   | 7  |  |  |   |  | 8  |  |  |   |  |  |  |  | 1 |  | 28  |
| 361  |     |  | 1 | 1 |    |   |    |  |  |   |  | 1  |  |  | 6 |  |  |  |  |   |  | 9   |

|     |     |   |   |   |    |   |   |  |  |  |   |     |  |  |  |   |  |  |  |  |    |     |
|-----|-----|---|---|---|----|---|---|--|--|--|---|-----|--|--|--|---|--|--|--|--|----|-----|
| 371 |     |   |   |   | 1  |   |   |  |  |  |   | 20  |  |  |  |   |  |  |  |  |    | 21  |
| 381 | 1   |   |   |   |    |   |   |  |  |  |   |     |  |  |  |   |  |  |  |  |    | 1   |
| 411 |     |   |   |   |    |   |   |  |  |  |   | 3   |  |  |  |   |  |  |  |  |    | 3   |
| 421 |     |   |   |   |    |   |   |  |  |  |   | 10  |  |  |  |   |  |  |  |  |    | 10  |
| 431 | 8   |   |   |   |    |   |   |  |  |  |   |     |  |  |  |   |  |  |  |  |    | 8   |
| 451 |     |   |   |   | 2  |   |   |  |  |  |   | 1   |  |  |  | 1 |  |  |  |  |    | 4   |
| 461 | 2   |   |   | 2 | 17 | 1 |   |  |  |  |   | 4   |  |  |  |   |  |  |  |  |    | 26  |
| 471 |     |   |   | 3 | 2  |   |   |  |  |  |   |     |  |  |  |   |  |  |  |  | 10 | 15  |
| 481 | 26  |   |   |   |    |   |   |  |  |  |   | 78  |  |  |  |   |  |  |  |  |    | 104 |
| 491 |     |   |   |   |    |   |   |  |  |  |   |     |  |  |  | 3 |  |  |  |  |    | 3   |
| 511 | 145 |   |   |   | 1  |   |   |  |  |  |   |     |  |  |  | 1 |  |  |  |  | 1  | 148 |
| 521 | 1   |   |   |   |    |   |   |  |  |  |   |     |  |  |  |   |  |  |  |  |    | 1   |
| 531 | 2   |   |   |   |    |   |   |  |  |  |   |     |  |  |  |   |  |  |  |  |    | 2   |
| 541 |     |   |   |   | 1  |   |   |  |  |  |   |     |  |  |  | 1 |  |  |  |  |    | 2   |
| 856 | 25  |   |   |   | 1  |   |   |  |  |  | 3 | 150 |  |  |  | 2 |  |  |  |  |    | 181 |
| 571 | 22  | 3 | 7 | 1 | 3  |   | 2 |  |  |  |   | 25  |  |  |  | 5 |  |  |  |  |    | 68  |
| 573 | 48  |   |   |   |    |   |   |  |  |  |   | 21  |  |  |  |   |  |  |  |  | 1  | 70  |
| 801 | 1   |   |   |   | 1  |   |   |  |  |  |   |     |  |  |  |   |  |  |  |  |    | 2   |
| 621 | 1   |   |   | 1 | 1  |   |   |  |  |  |   |     |  |  |  | 2 |  |  |  |  |    | 5   |

|     |    |  |   |    |   |   |    |  |   |   |  |    |  |  |    |  |  |  |  |  |    |    |
|-----|----|--|---|----|---|---|----|--|---|---|--|----|--|--|----|--|--|--|--|--|----|----|
| 631 |    |  |   |    | 7 |   |    |  |   |   |  |    |  |  |    |  |  |  |  |  |    | 7  |
| 636 |    |  |   |    | 1 |   | 11 |  |   | 1 |  |    |  |  |    |  |  |  |  |  |    | 13 |
| 651 |    |  |   |    |   |   |    |  |   |   |  | 1  |  |  |    |  |  |  |  |  |    | 1  |
| 661 | 11 |  | 1 |    |   |   |    |  |   |   |  |    |  |  |    |  |  |  |  |  |    | 12 |
| 663 | 1  |  |   | 31 |   |   |    |  |   |   |  |    |  |  |    |  |  |  |  |  |    | 32 |
| 671 |    |  |   |    |   |   |    |  |   |   |  |    |  |  | 1  |  |  |  |  |  |    | 1  |
| 681 |    |  | 6 |    |   |   |    |  |   |   |  | 3  |  |  |    |  |  |  |  |  |    | 9  |
| 701 |    |  |   |    |   |   |    |  |   |   |  | 1  |  |  |    |  |  |  |  |  |    | 1  |
| 702 |    |  |   |    | 3 |   |    |  |   |   |  | 3  |  |  |    |  |  |  |  |  |    | 6  |
| 721 | 3  |  |   |    |   |   |    |  |   |   |  |    |  |  |    |  |  |  |  |  |    | 3  |
| 741 |    |  |   |    |   |   |    |  | 1 |   |  | 8  |  |  | 5  |  |  |  |  |  |    | 14 |
| 761 | 6  |  |   |    | 1 | 3 | 1  |  |   |   |  | 4  |  |  | 10 |  |  |  |  |  | 32 | 57 |
| 771 |    |  |   |    |   |   |    |  |   |   |  |    |  |  | 2  |  |  |  |  |  |    | 2  |
| 781 | 6  |  |   |    | 6 |   |    |  |   |   |  | 5  |  |  | 4  |  |  |  |  |  |    | 21 |
| 791 | 2  |  |   | 1  | 2 | 1 |    |  |   |   |  | 12 |  |  |    |  |  |  |  |  |    | 18 |
| 711 |    |  |   |    |   |   |    |  |   |   |  |    |  |  | 4  |  |  |  |  |  |    | 4  |
| 811 | 1  |  |   |    | 2 |   |    |  |   |   |  | 1  |  |  |    |  |  |  |  |  |    | 4  |
| 821 | 5  |  |   |    | 6 | 1 |    |  |   |   |  |    |  |  | 8  |  |  |  |  |  | 2  | 22 |
| 826 | 3  |  |   |    | 6 |   | 1  |  |   |   |  | 5  |  |  | 24 |  |  |  |  |  | 1  | 40 |

|     |    |  |   |     |    |   |   |  |  |   |  |    |  |  |    |  |  |  |  |  |   |     |
|-----|----|--|---|-----|----|---|---|--|--|---|--|----|--|--|----|--|--|--|--|--|---|-----|
| 831 | 12 |  |   |     | 1  |   |   |  |  | 1 |  | 6  |  |  | 6  |  |  |  |  |  | 3 | 29  |
| 841 | 3  |  |   |     | 8  |   |   |  |  |   |  | 9  |  |  | 7  |  |  |  |  |  |   | 27  |
| 854 | 1  |  |   |     |    |   | 1 |  |  |   |  |    |  |  |    |  |  |  |  |  |   | 2   |
| 857 | 6  |  |   | 192 | 2  |   |   |  |  |   |  | 6  |  |  | 1  |  |  |  |  |  |   | 207 |
| 859 | 12 |  |   |     | 18 |   |   |  |  | 4 |  | 15 |  |  | 47 |  |  |  |  |  |   | 96  |
| 801 |    |  |   |     | 2  |   |   |  |  |   |  | 7  |  |  |    |  |  |  |  |  |   | 9   |
| 870 |    |  |   |     |    |   |   |  |  |   |  |    |  |  | 1  |  |  |  |  |  |   | 1   |
| 872 | 9  |  |   |     | 11 |   |   |  |  |   |  | 52 |  |  | 10 |  |  |  |  |  |   | 82  |
| 873 | 1  |  |   |     | 1  |   |   |  |  |   |  |    |  |  | 1  |  |  |  |  |  |   | 3   |
| 876 | 4  |  |   |     |    |   |   |  |  |   |  | 19 |  |  |    |  |  |  |  |  |   | 23  |
| 878 | 10 |  |   |     | 1  |   |   |  |  |   |  | 11 |  |  | 9  |  |  |  |  |  |   | 31  |
| 886 | 2  |  |   |     | 3  |   |   |  |  |   |  | 7  |  |  |    |  |  |  |  |  |   |     |
| 901 |    |  |   |     |    |   |   |  |  |   |  | 6  |  |  |    |  |  |  |  |  |   | 6   |
| 911 |    |  |   |     | 1  |   |   |  |  |   |  |    |  |  | 5  |  |  |  |  |  |   | 6   |
| 931 |    |  |   |     |    |   | 2 |  |  |   |  |    |  |  | 10 |  |  |  |  |  |   | 12  |
| 941 |    |  | 1 | 4   | 3  |   |   |  |  |   |  |    |  |  |    |  |  |  |  |  | 3 | 11  |
| 961 |    |  |   |     | 1  |   |   |  |  |   |  |    |  |  | 2  |  |  |  |  |  |   | 3   |
| 963 | 1  |  |   |     |    |   |   |  |  |   |  |    |  |  |    |  |  |  |  |  |   | 1   |
| 971 | 3  |  |   | 7   |    | 1 |   |  |  |   |  |    |  |  | 15 |  |  |  |  |  |   | 26  |



|       |      |    |     |     |      |     |     |    |   |    |    |      |   |   |      |   |    |    |   |    |     |      |
|-------|------|----|-----|-----|------|-----|-----|----|---|----|----|------|---|---|------|---|----|----|---|----|-----|------|
| 981   | 83   |    | 2   |     | 2    |     |     |    |   |    | 1  | 2    |   |   | 2    |   |    |    |   |    | 40  | 132  |
| 991   | 3    |    | 2   |     | 10   | 3   |     |    |   | 1  |    |      |   |   | 14   |   |    |    |   |    |     | 33   |
| indet |      |    |     |     |      |     |     |    |   |    |    | 1    |   |   |      |   |    |    |   |    | 1   | 2    |
| Total | 1780 | 40 | 103 | 693 | 1020 | 542 | 686 | 11 | 6 | 83 | 10 | 1817 | 9 | 1 | 1374 | 4 | 45 | 28 | 1 | 18 | 521 | 8794 |



[illegible]



|      |   |   |   |   |   |   |   |  |  |   |  |  |  |  |  |   |
|------|---|---|---|---|---|---|---|--|--|---|--|--|--|--|--|---|
| 1436 | 1 |   |   |   | 1 |   |   |  |  |   |  |  |  |  |  | 2 |
| 1441 | 1 |   |   |   | 1 |   |   |  |  |   |  |  |  |  |  | 2 |
| 1451 |   |   |   |   | 1 |   |   |  |  |   |  |  |  |  |  | 1 |
| 1461 | 1 |   |   |   |   |   | 3 |  |  |   |  |  |  |  |  | 4 |
| 1470 | 1 |   |   |   | 1 | 1 |   |  |  |   |  |  |  |  |  | 3 |
| 1476 | 1 |   | 1 |   | 1 | 1 | 1 |  |  |   |  |  |  |  |  | 5 |
| 1501 |   |   |   |   | 1 |   | 1 |  |  |   |  |  |  |  |  | 2 |
| 1511 |   |   |   |   |   |   | 1 |  |  |   |  |  |  |  |  | 1 |
| 1521 |   |   |   |   |   |   |   |  |  |   |  |  |  |  |  | - |
| 1531 | 1 |   |   |   |   |   |   |  |  |   |  |  |  |  |  | 1 |
| 1541 | 1 |   |   |   |   | 1 | 1 |  |  |   |  |  |  |  |  | 3 |
| 1551 | 1 |   |   |   | 1 |   |   |  |  |   |  |  |  |  |  | 2 |
| 1561 | 1 |   |   |   |   | 1 |   |  |  | 1 |  |  |  |  |  | 3 |
| 1581 | 1 |   |   |   | 1 |   |   |  |  |   |  |  |  |  |  | 2 |
| 1591 |   |   |   |   |   |   |   |  |  |   |  |  |  |  |  | - |
| 1601 | 1 | 1 |   | 1 | 1 |   |   |  |  |   |  |  |  |  |  | 4 |
| 1611 | 1 |   |   |   |   |   |   |  |  |   |  |  |  |  |  | 1 |
| 1621 | 2 |   |   |   | 2 |   |   |  |  | 1 |  |  |  |  |  | 5 |

[illegible]

[illegible]

[illegible]





[illegible]



|      |   |   |   |   |   |   |   |  |   |   |  |  |  |  |  |   |
|------|---|---|---|---|---|---|---|--|---|---|--|--|--|--|--|---|
| 2666 | 1 |   |   |   |   |   |   |  |   |   |  |  |  |  |  | 1 |
| 2681 |   |   |   |   | 1 |   |   |  | 1 | 1 |  |  |  |  |  | 4 |
| 2691 | 1 |   |   |   | 1 |   |   |  |   | 1 |  |  |  |  |  | 3 |
| 2692 |   |   |   | 1 |   |   |   |  |   |   |  |  |  |  |  | 1 |
| 2693 | 1 |   |   | 1 |   |   |   |  |   |   |  |  |  |  |  | 2 |
| 2101 | 1 |   | 1 |   |   |   |   |  |   |   |  |  |  |  |  | 2 |
| 2711 |   |   |   |   |   | 1 |   |  |   |   |  |  |  |  |  | 1 |
| 2730 | 1 |   |   |   |   |   |   |  |   |   |  |  |  |  |  | 1 |
| 2731 | 1 |   |   |   | 1 | 1 |   |  |   |   |  |  |  |  |  | 3 |
| 2743 |   |   |   |   |   |   |   |  |   |   |  |  |  |  |  | - |
| 2745 |   |   |   |   |   |   |   |  |   |   |  |  |  |  |  | - |
| 2351 | 1 |   |   |   |   |   |   |  |   | 1 |  |  |  |  |  | 1 |
| 2761 | 1 |   | 1 |   | 1 | 1 |   |  |   | 1 |  |  |  |  |  | 5 |
| 2776 |   |   |   |   | 1 |   | 1 |  |   |   |  |  |  |  |  | 2 |
| 2796 | 1 |   |   |   | 1 |   | 1 |  |   | 1 |  |  |  |  |  | 4 |
| 2799 |   | 1 |   |   |   |   |   |  |   |   |  |  |  |  |  | 1 |
| 2811 | 1 |   |   |   | 1 |   |   |  |   | 1 |  |  |  |  |  | 3 |
| 2821 |   |   |   | 1 | 1 |   |   |  |   | 1 |  |  |  |  |  | 3 |





[illegible]

[illegible]



[illegible]

|              |     |    |    |    |     |    |    |   |   |    |   |   |   |   |   |     |
|--------------|-----|----|----|----|-----|----|----|---|---|----|---|---|---|---|---|-----|
| 859          | 1   |    |    |    | 1   |    |    |   |   | 1  |   |   |   |   |   | 3   |
| 801          |     |    |    |    | 1   |    |    |   |   |    |   |   |   |   |   | 1   |
| 870          |     |    |    | 1  |     |    |    |   |   |    |   |   |   |   |   | -   |
| 872          | 1   |    |    |    | 1   |    |    |   |   |    |   |   |   |   |   | 2   |
| 873          | 1   |    |    |    | 1   |    |    |   |   |    |   |   |   |   |   | 1   |
| 876          | 1   |    |    |    |     |    |    |   |   |    |   |   |   |   |   | 1   |
| 878          | 1   |    |    |    | 1   |    |    |   |   |    |   |   |   |   |   | 2   |
| 886          | 1   |    |    |    | 1   |    |    |   |   |    |   |   |   |   |   | 2   |
| 901          |     |    |    |    |     |    |    |   |   |    |   |   |   |   |   | -   |
| 911          |     |    |    |    | 1   |    |    |   |   |    |   |   |   |   |   | 1   |
| 931          |     |    |    |    |     |    | 1  |   |   |    |   |   |   |   |   | 1   |
| 941          |     |    | 1  | 4  | 1   |    |    |   |   |    |   |   |   |   |   | 6   |
| 961          |     |    |    |    | 1   |    |    |   |   |    |   |   |   |   |   | 3   |
| 963          | 1   |    |    |    |     |    |    |   |   |    |   |   |   |   |   | 1   |
| 971          | 1   |    |    | 1  |     | 1  |    |   |   |    |   |   |   |   |   | 3   |
| 981          | 1   |    | 1  |    | 1   |    |    |   |   |    | 1 |   |   |   |   | 4   |
| 991          | 1   |    | 1  |    | 1   | 1  |    |   |   | 1  |   |   |   |   |   | 5   |
| <b>Total</b> | 193 | 13 | 41 | 47 | 178 | 47 | 67 | 3 | 4 | 35 | 8 | 1 | 1 | 1 | 1 | 637 |

|   |      |     |     |     |      |     |      |     |     |     |     |     |     |     |     |  |
|---|------|-----|-----|-----|------|-----|------|-----|-----|-----|-----|-----|-----|-----|-----|--|
| % | 30,1 | 2,0 | 6,4 | 7,4 | 27,9 | 7,4 | 10,4 | 0,5 | 0,6 | 5,5 | 1,3 | 0,2 | 0,2 | 0,2 | 0,2 |  |
|---|------|-----|-----|-----|------|-----|------|-----|-----|-----|-----|-----|-----|-----|-----|--|

4 Supplementary Tables S4–S6. Mortality Pattern for *Bos*, *Ovis*, *Capra* and *Sus*.

Supplementary Table S4. Mortality Pattern for *Bos taurus*.

| <i>Bos taurus</i>         |      |                        |               |                                |
|---------------------------|------|------------------------|---------------|--------------------------------|
| Chronology                | SU   | Skeletal Unit          | Age in months | Preliminary seasonal estimates |
| Bell-Beaker<br>Bronze Age | 2201 | Mandible and teeth     | 5-6           | Autumn                         |
|                           | 2417 | Long Bones             | 48            | Spring-Summer                  |
|                           | 573  | Mandible and teeth     | 22-24         | Spring-Summer                  |
| Middle<br>Bronze Age      | 3211 | Radio                  | 40            | Summer-Autumn                  |
|                           | 1366 | Mandible and teeth     | 36            | Spring-Summer                  |
|                           | 3171 | Mandible and Long Bone | 16-18         | Summer-Autumn                  |
|                           | 3171 | Long Bones             | 20            | Autum-Winter                   |
|                           | 3171 | Long Bones             | 30            | Autum                          |
|                           | 3136 | Mandible and teeth     | 15-18         | Summer-Autumn                  |
|                           | 3171 | Radio                  | 35?           | Spring?                        |
|                           | 2553 | Mandible and teeth     | 5             | Autum                          |
|                           | 2631 | Mandible and teeth     | 4-5           | Autum                          |
|                           | 2081 | Tibiae                 | 50            | ¿?                             |

Supplementary Table S5. Mortality Pattern for *Sus*.

| <i>Sus domesticus</i>     |      |                       |               |                                |
|---------------------------|------|-----------------------|---------------|--------------------------------|
| Chronology                | SU   | Skeletal Unit         | Age in months | Preliminary seasonal estimates |
| Bell-Beaker<br>Bronze Age | 1251 | Long Bone             | 42            | Autum                          |
|                           | 2201 | Mandible              | 19-21         | Autum-Winter                   |
|                           | 2201 | Maxillar              | 8-10          | Winter                         |
| Middle<br>Bronze Age      | 2371 | Long Bone             | o             | Winter                         |
|                           | 1461 | Long Bone             | 0-2           | Spring                         |
|                           | 1461 | Mandible and Maxillar | 14-17         | Summer-Autumn                  |
|                           | 1461 | Mandible              | 4 es          | Summer                         |
|                           | 1461 | Maxillar              | 18-19         | Autum                          |
|                           | 1461 | Maxillar              | 19-21         | Winter                         |
|                           | 1431 | Mandible              | 14-17         | Summer-Autumn                  |
|                           | 3011 | Mandible              | 17-19         | Autum                          |
|                           | 3011 | Mandible              | 10-11         | Winter                         |
|                           | 1476 | Maxillar              | 6-8           | Autum-Winter                   |
|                           | 1423 | Phalange              | 18?           | Autum-Winter                   |
|                           | 1091 | Mandible              | 19-21         | Winter                         |
|                           | 1331 | Mandible and Maxillar | 19-21         | Winter                         |
|                           | 2331 | Maxillar              | 17            | Autum                          |
|                           | 1662 | All skeletal          | 19-21         | Winter                         |

**Supplementary Table S6. Mortallity Pattern for *Ovis* and *Capra*.**

| <i>Ovis aries</i>         |      |                     |               |                                |
|---------------------------|------|---------------------|---------------|--------------------------------|
| Chronology                | SU   | Skeletal Unit       | Age in months | Preliminary seasonal estimates |
| Bell-Beaker<br>Bronze Age | 1251 | M1 Lower            | 5             | Autum                          |
|                           | 1251 | M1 Lower            | 6             | Autum                          |
| Middle<br>Bronze Age      | 2461 | Mandible            | 9             | Winter                         |
|                           | 571  | P4 Lower            | 18            | Autum                          |
|                           | 2761 | P4 Lower            | 6             | Autum                          |
| Chronology                | SU   | <i>Capra hircus</i> |               |                                |
| Bell-Beaker<br>Bronze Age | 1251 | M1 Lower            | 17            | Autum                          |
| Middle<br>Bronze Age      | 1664 | All skeletal        | 1-3           | Summer-Autummm                 |
|                           | 2693 | All skeletal        | 1-3           | Summer-Autummm                 |
|                           | 2641 | M3 Lower            | 18            | Autum                          |
|                           | 471  | M2 Lower            | 6-7           | Autum                          |
|                           | 2223 | M1 Lower            | 23-24         | Winter                         |
|                           | 441  | M1 Lower            | 23-24         | Winter                         |
|                           | 571  | M2 Lower            | 4-5           | Autum                          |
|                           | 941  | M1 Lower            | 26-30         | Summer-Autummm?                |
|                           | 791  | M1 Lower            | 25-30         | Summer-Autummm?                |
| Chronology                | SU   | <i>OVIS / CAPRA</i> |               |                                |
| Bell-Beaker<br>Bronze Age | 1251 | M3 upper            | 18            | Autum                          |
|                           | 1251 | P4 Lower            | 5             | Autum                          |
|                           | 2811 | M3 upper            | 9             | Winter                         |
|                           | 991  | Maxillar            | 7             | Autum                          |
|                           | 3021 | M2 upper            | 6             | Autum                          |
|                           | 2414 | M2 upper            | 6             | Autum                          |
|                           | 2776 | All skeletal        | 1-3           | Spring-Summer                  |

**5 Supplementary Tables S7 and S8. Carnivore tooth marks for the Bronze Age of Pista de Motos**

**Supplementary Table S7. Carnivore tooth marks –TM- for Pista de Motos.**

| NISP with tooth marks | <i>Equus</i> | <i>Bos</i> | <i>Canis</i> | <i>Ovis / Capra</i> | <i>Ovis</i> | <i>Capra</i> | <i>All Ovis and Capra</i> | <i>Sus</i> | <i>Cervus</i> | <i>Lepus</i> | <i>Oryct.</i> | Large Size | Small size | Indet |
|-----------------------|--------------|------------|--------------|---------------------|-------------|--------------|---------------------------|------------|---------------|--------------|---------------|------------|------------|-------|
| Horn                  |              | 1          |              |                     |             | 0            | 0                         |            |               |              |               |            |            |       |
| Craneal               |              | 0          | 0            | 3                   |             | 0            | 3                         | 0          |               |              | 0             | 2          | 0          | 0     |
| Mandible              | 0            | 0          | 0            | 3                   | 0           | 1            | 4                         | 0          |               |              | 0             | 1          | 0          |       |
| Vertabrae             | 0            | 2          | 0            | 3                   | 0           | 1            | 4                         | 1          |               |              | 0             | 1          | 0          | 0     |
| Rib                   | 0            | 12         | 2            | 4                   | 0           | 1            | 5                         | 2          |               |              |               | 0          | 0          |       |
| Scapule               | 1            | 5          |              | 2                   | 0           | 0            | 2                         | 1          |               | 0            | 0             | 0          | 0          |       |
| Humerus               | 1            | 10         |              | 5                   | 1           | 0            | 6                         | 4          |               |              | 0             | 0          | 2          |       |
| Radio                 | 0            | 6          | 2            | 6                   | 1           | 3            | 10                        | 0          | 1             | 0            | 0             |            | 0          |       |
| Ulna                  | 0            | 3          | 1            | 1                   |             | 0            | 1                         | 1          |               |              | 0             |            |            |       |
| Metacarpal            |              | 8          |              | 3                   | 3           |              | 6                         |            | 0             |              |               |            |            |       |
| Pelvis                | 0            | 3          |              | 1                   | 0           | 0            | 1                         | 0          | 0             | 0            | 1             | 0          |            |       |
| Femur                 | 0            | 3          |              | 3                   | 0           | 0            | 3                         | 2          | 0             |              | 0             | 1          | 0          |       |
| Tibia                 | 1            | 7          | 1            | 15                  | 0           |              | 15                        | 3          | 0             | 1            | 0             | 1          | 0          |       |
| Metatarsal            | 0            | 9          |              | 6                   | 0           | 1            | 7                         |            | 0             |              |               |            | 0          |       |
| Metapodial            | 0            | 2          | 0            | 1                   |             |              | 1                         | 0          | 0             |              | 1             | 0          |            |       |
| Talus                 |              | 3          |              |                     | 0           | 0            | 0                         | 0          |               |              |               |            |            |       |
| Calcaneous            | 0            | 2          | 0            | 0                   | 0           | 0            | 0                         |            | 0             |              | 0             |            |            |       |
| Phalange              | 0            | 3          |              | 0                   |             |              | 0                         | 1          |               |              |               |            |            |       |
| indet.                |              |            |              | 0                   |             |              | 0                         |            |               |              |               | 33         | 41         | 2     |
| Total                 | 3            | 79         | 6            | 56                  | 5           | 7            | 68                        | 15         | 1             | 1            | 2             | 39         | 43         | 2     |

**Supplementary Table S8. % Carnivore tooth marks –TM- for Pista de Motos.**

| % NISP with tooth marks | <i>Equus</i> | <i>Bos</i> | <i>Canis</i> | <i>Ovis /Capra</i> | <i>Ovis</i> | <i>Capra</i> | <i>All Ovis and Capra</i> | <i>Sus</i> | <i>Cervus</i> | <i>Lepus</i> | <i>Oryct.</i> | Large Size | Small size | Indet |
|-------------------------|--------------|------------|--------------|--------------------|-------------|--------------|---------------------------|------------|---------------|--------------|---------------|------------|------------|-------|
| Horn                    |              | 1.1        |              |                    |             |              |                           |            |               |              |               |            |            |       |
| Craneal                 |              |            |              | 3.8                |             |              | 3.5                       |            |               |              |               | 1.7        |            |       |
| Mandible                |              |            |              | 6.4                |             | 5.0          | 5.6                       |            |               |              |               | 6.7        |            |       |
| Vertabrae               |              | 0.7        |              | 4.4                |             | 0.4          | 1.6                       | 1.5        |               |              |               | 2.9        |            |       |
| Rib                     |              | 5.1        | 3.9          | 1.2                |             | 0.7          | 1.1                       | 2.3        |               |              |               |            |            |       |
| Scapule                 | 100.0        | 21.7       |              | 6.7                |             |              | 4.7                       | 25.0       |               |              |               |            |            |       |
| Humerus                 | 50.0         | 22.7       |              | 12.5               | 25.0        |              | 10.5                      | 36.4       |               |              |               |            | 28.6       |       |
| Radio                   |              | 9.4        | 25.0         | 24.0               | 12.5        | 12.0         | 17.2                      |            | 100.0         |              |               |            |            |       |
| Ulna                    |              | 10.3       | 12.5         | 8.3                |             |              | 4.5                       | 7.7        |               |              |               |            |            |       |
| Metacarpal              |              | 25.0       |              | 37.5               | 37.5        |              | 27.3                      |            |               |              |               |            |            |       |
| Pelvis                  |              | 17.6       |              | 5.0                |             |              | 3.3                       |            |               |              | 9.1           |            |            |       |
| Femur                   |              | 13.0       |              | 13.6               |             |              | 10.0                      | 16.7       |               |              |               | 50.0       |            |       |
| Tibia                   | 25.0         | 13.5       | 12.5         | 26.3               |             |              | 23.1                      | 33.3       |               | 50.0         |               | 10.0       |            |       |
| Metatarsal              |              | 37.5       |              | 17.1               |             | 11.1         | 14.9                      |            |               |              |               |            |            |       |
| Metapodial              |              | 15.4       |              | 10.0               |             |              | 10.0                      |            |               |              | 6.7           |            |            |       |

|            |     |      |     |     |      |     |     |     |      |      |     |     |     |     |
|------------|-----|------|-----|-----|------|-----|-----|-----|------|------|-----|-----|-----|-----|
| Talus      |     | 15.0 |     |     |      |     |     |     |      |      |     |     |     |     |
| Calcaneous |     | 14.3 |     |     |      |     |     |     |      |      |     |     |     |     |
| Phalange   |     | 3.7  |     |     |      |     |     | 1.4 |      |      |     |     |     |     |
| indet.     |     |      |     |     |      |     |     |     |      |      |     | 2.2 | 3.3 | 0.4 |
| Total      | 8.3 | 5.3  | 1.7 | 6.5 | 10.6 | 0.8 | 4.5 | 3.3 | 10.0 | 16.7 | 2.4 | 2.2 | 3.1 | 0.4 |

## 6 Supplementary Table S9. Burn bones.

| SU   | <i>Bos</i> | <i>Capra</i> | <i>Oryctolagus</i> | <i>Equus</i> | Large<br>Size<br>animal | Indet | <i>Lepus</i> | <i>Ovis /<br/>Capra</i> | <i>Ovis</i> | Small<br>Size<br>Animals | <i>Sus<br/>dom.</i> | Burn<br>Bones<br>NISP | NISP<br>Total |
|------|------------|--------------|--------------------|--------------|-------------------------|-------|--------------|-------------------------|-------------|--------------------------|---------------------|-----------------------|---------------|
| 1101 | 3          |              |                    |              | 9                       |       |              | 1                       |             | 1                        |                     | 14                    | 17            |
| 1221 |            |              |                    |              |                         |       |              |                         |             | 1                        |                     | 1                     | 14            |
| 1222 |            |              |                    |              |                         |       |              | 1                       |             |                          |                     | 1                     | 21            |
| 1331 | 1          |              |                    |              | 1                       |       |              |                         |             |                          |                     | 2                     | 265           |
| 1336 |            |              |                    |              | 4                       |       |              |                         |             |                          |                     | 4                     | 573           |
| 1361 | 3          |              |                    |              | 1                       |       | 1            |                         |             |                          |                     | 5                     | 248           |
| 1401 |            |              |                    |              |                         |       |              | 1                       |             |                          |                     | 1                     | 8             |
| 1651 |            |              |                    |              | 4                       | 4     |              |                         |             | 4                        |                     | 12                    | 13            |
| 1681 |            |              |                    |              |                         |       |              |                         |             | 4                        |                     | 4                     | 7             |
| 1841 |            |              |                    |              |                         |       |              |                         |             | 1                        |                     | 1                     | 20            |
| 1961 |            |              |                    |              |                         |       |              |                         |             | 4                        |                     | 4                     | 15            |
| 1921 |            |              |                    |              |                         |       |              |                         |             | 1                        |                     | 1                     | 16            |
| 1981 |            |              |                    |              |                         |       |              | 1                       |             |                          |                     | 1                     | 36            |
| 962  |            |              |                    |              |                         | 5     |              |                         |             | 1                        |                     | 6                     | 9             |
| 2111 |            |              |                    |              |                         |       |              | 1                       |             |                          |                     | 1                     | 4             |
| 2161 | 1          |              |                    |              |                         |       |              |                         |             |                          |                     | 1                     | 19            |
| 2201 |            |              |                    | 3            |                         |       |              | 1                       |             |                          |                     | 4                     | 197           |
| 2227 | 1          |              |                    |              | 3                       | 4     |              | 1                       |             |                          |                     | 9                     | 9             |
| 2236 | 1          |              |                    |              |                         |       |              |                         |             |                          |                     | 1                     | 64            |
| 2301 |            |              |                    |              |                         |       |              |                         |             | 3                        |                     | 3                     | 20            |
| 2371 |            |              | 4                  |              |                         |       |              | 1                       |             |                          |                     | 5                     | 102           |
| 2391 | 2          |              |                    |              | 2                       |       |              |                         |             |                          |                     | 4                     | 213           |

|       |    |   |   |   |    |    |   |    |   |    |   |     |     |
|-------|----|---|---|---|----|----|---|----|---|----|---|-----|-----|
| 2396  | 1  |   |   |   |    |    |   |    |   |    |   | 1   | 72  |
| 2411  | 1  |   | 3 |   |    |    |   | 1  |   |    |   | 5   | 49  |
| 2417  |    |   |   |   | 8  |    |   |    |   |    |   | 8   | 111 |
| 2491  | 1  |   |   |   |    |    |   | 4  |   | 1  |   | 6   | 16  |
| 2521  | 1  |   |   |   |    |    |   | 3  |   | 6  |   | 10  | 41  |
| 2561  | 2  |   |   |   |    | 4  |   | 9  | 2 |    |   | 17  | 25  |
| 2652  |    |   |   |   | 12 |    |   | 3  | 1 | 7  |   | 23  | 23  |
| 2351  | 8  |   |   |   |    |    |   |    |   |    |   | 8   | 87  |
| 2823  |    | 1 |   |   |    |    |   |    |   |    |   | 1   | 16  |
| 2911  |    |   |   |   | 9  |    |   |    | 1 |    |   | 10  | 17  |
| 2981  | 2  |   |   |   | 1  |    |   |    |   |    |   | 3   | 27  |
| 2961  |    |   |   |   |    |    |   |    |   | 1  |   | 1   | 1   |
| 3021  | 11 |   |   |   | 2  | 16 |   |    |   |    |   | 29  | 252 |
| 3081  | 2  |   |   |   | 1  |    |   | 1  |   | 3  |   | 7   | 13  |
| 3082  |    |   |   |   |    |    |   |    |   | 2  |   | 2   | 8   |
| 3091  | 1  |   |   |   |    |    |   |    |   |    |   | 1   | 22  |
| 3098  |    |   |   |   |    | 5  |   |    |   |    |   | 5   | 72  |
| 3171  | 21 |   |   |   |    |    |   |    |   |    |   | 21  | 155 |
| 351   | 3  |   |   |   |    |    |   |    |   |    | 1 | 4   | 8   |
| 461   |    | 1 |   |   |    |    |   | 3  |   |    |   | 4   | 26  |
| 573   | 7  |   |   |   |    |    |   |    |   |    |   | 7   | 70* |
| 761   | 1  |   |   |   |    |    |   |    |   |    |   | 1   | 57  |
| 826   |    |   |   |   |    |    |   | 1  |   |    |   | 1   | 40  |
| 859   |    |   |   |   |    |    |   | 1  |   |    |   | 1   | 96  |
| 801   |    |   |   |   |    |    |   | 2  |   |    |   | 2   | 9   |
| 878   |    |   |   |   | 3  |    |   |    |   |    |   | 3   | 29  |
| 901   |    |   |   |   | 6  |    |   |    |   |    |   | 6   | 6   |
| 981   |    |   |   |   |    |    |   |    |   | 2  |   | 2   | 132 |
| Total | 74 | 2 | 7 | 3 | 66 | 38 | 1 | 36 | 4 | 42 | 1 | 274 |     |





1. Supplementary Tables S10 and S11. Bones with cut marks

Supplementary Table S10 Bones with cut marks.

| NISP with cut mark | <i>Equus ferus</i> | <i>Bos taurus</i> | <i>Canis familiaris</i> | <i>Ovis/Capra</i> | <i>Ovis aries</i> | <i>Capra hircus</i> | <i>All Ovis/Capra</i> | <i>Sus domesticus</i> | <i>Sus scrofa</i> | <i>Cervus elaphus</i> | <i>Lepus sp</i> | <i>Oryct. cunic.</i> | Large Size Mammal | Small Size Mammal | Indet |
|--------------------|--------------------|-------------------|-------------------------|-------------------|-------------------|---------------------|-----------------------|-----------------------|-------------------|-----------------------|-----------------|----------------------|-------------------|-------------------|-------|
| Horn               |                    | 1                 |                         |                   |                   | 0                   | 0                     |                       |                   |                       |                 |                      |                   |                   |       |
| Craneal            |                    | 1                 | 0                       | 1                 |                   | 0                   | 1                     | 2                     |                   |                       | 0               | 0                    | 3                 | 4                 | 0     |
| Maxillar           |                    | 1                 | 0                       | 1                 |                   |                     | 1                     | 0                     | 0                 |                       |                 |                      | 0                 |                   |       |
| Mandible           | 0                  | 8                 | 2                       | 2                 | 0                 | 1                   | 3                     | 2                     |                   |                       |                 | 0                    | 3                 | 0                 |       |
| Vertebrae          | 0                  | 9                 | 0                       | 1                 | 0                 | 1                   | 2                     | 0                     |                   |                       |                 | 0                    | 1                 | 2                 | 0     |
| Rib                | 0                  | 26                | 2                       | 27                | 0                 | 1                   | 28                    | 2                     |                   |                       |                 |                      | 8                 | 4                 |       |
| Scapule            | 0                  | 6                 |                         | 5                 | 2                 | 0                   | 7                     | 1                     |                   |                       | 0               | 0                    | 1                 | 0                 |       |
| Indet Upper Limb   | 0                  | 0                 |                         | 0                 |                   |                     | 0                     |                       |                   |                       |                 |                      | 2                 |                   |       |
| Humerus            | 0                  | 13                |                         | 5                 | 1                 | 1                   | 7                     | 2                     |                   |                       |                 | 0                    | 8                 | 1                 |       |
| Radio              | 0                  | 18                | 0                       | 5                 | 0                 | 3                   | 8                     | 1                     | 0                 | 0                     | 0               | 0                    |                   | 0                 |       |
| Ulna               | 1                  | 5                 | 0                       | 2                 |                   | 1                   | 3                     | 1                     | 0                 |                       |                 | 0                    |                   |                   |       |
| Metacarpal         |                    | 4                 |                         | 0                 | 0                 |                     | 0                     |                       |                   | 0                     |                 |                      |                   |                   |       |
| Carpal             |                    | 1                 |                         |                   |                   |                     |                       |                       |                   |                       |                 |                      | 0                 |                   |       |
| Pelvis             | 0                  | 3                 |                         | 1                 | 0                 | 1                   | 2                     | 0                     |                   | 0                     | 0               | 0                    | 0                 |                   |       |
| Femur              | 0                  | 3                 |                         | 3                 | 1                 | 0                   | 4                     | 4                     |                   | 1                     |                 | 0                    | 1                 | 0                 |       |
| Tibia              | 0                  | 8                 | 0                       | 7                 | 0                 |                     | 7                     | 3                     | 0                 | 1                     | 1               | 2                    | 1                 | 0                 |       |
| Metatarsal         | 0                  | 3                 |                         | 2                 | 1                 | 0                   | 3                     |                       |                   | 0                     |                 |                      |                   | 0                 |       |
| Talus              |                    | 6                 |                         |                   | 0                 | 0                   | 0                     | 0                     | 1                 |                       |                 |                      |                   |                   |       |
| Calcaneous         | 0                  | 2                 | 0                       | 1                 | 1                 | 0                   | 2                     |                       |                   | 1                     |                 | 0                    |                   |                   |       |
| Phalange           | 0                  | 23                |                         | 0                 |                   |                     | 0                     | 0                     |                   |                       |                 |                      |                   |                   |       |
| indet.             |                    |                   |                         | 9                 |                   |                     | 9                     |                       |                   |                       |                 |                      | 37                | 29                | 3     |

|       |   |     |   |    |   |   |    |    |   |   |   |   |    |    |   |
|-------|---|-----|---|----|---|---|----|----|---|---|---|---|----|----|---|
| Total | 1 | 141 | 4 | 72 | 6 | 9 | 87 | 18 | 1 | 3 | 1 | 2 | 65 | 40 | 3 |
|-------|---|-----|---|----|---|---|----|----|---|---|---|---|----|----|---|

**Supplementary Table S11 Frequencies of bones with cut marks.**

| % NISP<br>with cut<br>mark | <i>Equus<br/>ferus</i> | <i>Bos<br/>taurus</i> | <i>Canis<br/>familiaris</i> | <i>Ovis/Capra</i> | <i>Ovis<br/>aries</i> | <i>Capra<br/>hircus</i> | <i>All<br/>Ovis/Capra</i> | <i>Sus<br/>domesticus</i> | <i>Sus<br/>scrofa</i> | <i>Cervus<br/>elaphus</i> | <i>Lepus<br/>sp</i> | <i>Oryct.<br/>cunic.</i> | Large<br>Size<br>Mammal | Small<br>Size<br>Mammal | Indet |
|----------------------------|------------------------|-----------------------|-----------------------------|-------------------|-----------------------|-------------------------|---------------------------|---------------------------|-----------------------|---------------------------|---------------------|--------------------------|-------------------------|-------------------------|-------|
| Horn                       |                        | 1.1                   |                             |                   |                       |                         |                           |                           |                       |                           |                     |                          |                         |                         |       |
| Craneal                    |                        | 0.4                   |                             | 1.3               |                       |                         | 1.2                       | 3.2                       |                       |                           |                     |                          | 2.6                     | 4.3                     |       |
| Maxillar                   |                        | 3.8                   |                             | 10.0              |                       |                         | 5.0                       |                           |                       |                           |                     |                          | 0.0                     |                         |       |
| Mandible                   |                        | 12.1                  | 8.7                         | 4.3               |                       | 5.0                     | 4.2                       | 8.7                       |                       |                           |                     |                          | 20.0                    |                         |       |
| Vertebrae                  |                        | 3.0                   |                             | 1.5               |                       | 0.4                     | 0.8                       |                           |                       |                           |                     |                          | 2.9                     | 15.4                    |       |
| Rib                        |                        | 11.1                  | 3.9                         | 8.2               |                       | 0.7                     | 6.3                       | 2.3                       |                       |                           |                     |                          | 14.0                    | 30.8                    |       |
| Scapule                    |                        | 26.1                  |                             | 16.7              | 66.7                  |                         | 16.3                      | 25.0                      |                       |                           |                     |                          | 20.0                    | 0.0                     |       |
| Indet<br>Upper<br>Limb     |                        |                       |                             |                   |                       |                         |                           |                           |                       |                           |                     |                          | 33.3                    |                         |       |
| Humerus                    |                        | 29.5                  |                             | 12.5              | 25.0                  | 7.7                     | 12.3                      | 18.2                      |                       |                           |                     |                          | 40.0                    | 14.3                    |       |
| Radio                      |                        | 28.1                  |                             | 20.0              |                       | 12.0                    | 13.8                      | 9.1                       |                       |                           |                     |                          |                         | 0.0                     |       |
| Ulna                       | 50.0                   | 17.2                  |                             | 16.7              |                       | 10.0                    | 13.6                      | 7.7                       |                       |                           |                     |                          |                         |                         |       |
| Metacarpal                 |                        | 12.5                  |                             |                   |                       |                         |                           |                           |                       |                           |                     |                          |                         |                         |       |
| Carpal                     |                        | 1.9                   |                             |                   |                       |                         |                           |                           |                       |                           |                     |                          |                         |                         |       |
| Pelvis                     |                        | 17.6                  |                             | 5.0               |                       | 11.1                    | 6.7                       |                           |                       |                           |                     |                          |                         |                         |       |
| Femur                      |                        | 13.0                  |                             | 13.6              | 100.0                 |                         | 13.3                      | 33.3                      |                       | 50.0                      |                     |                          | 50.0                    |                         |       |
| Tibia                      |                        | 15.4                  |                             | 12.3              |                       |                         | 10.8                      | 33.3                      |                       | 100.0                     | 50.0                | 13.3                     | 10.0                    |                         |       |
| Metatarsal                 |                        | 12.5                  |                             | 5.7               | 33.3                  |                         | 6.4                       |                           |                       |                           |                     |                          |                         |                         |       |
| Talus                      |                        | 30.0                  |                             |                   |                       |                         |                           |                           | 50.0                  |                           |                     |                          |                         |                         |       |
| Calcaneous                 |                        | 14.3                  |                             | 33.3              | 100.0                 |                         | 18.2                      |                           |                       | 100.0                     |                     |                          |                         |                         |       |

|          |     |      |     |      |      |     |      |     |      |      |      |     |     |     |     |
|----------|-----|------|-----|------|------|-----|------|-----|------|------|------|-----|-----|-----|-----|
| Phalange |     | 28.0 |     |      |      |     |      |     |      |      |      |     |     |     |     |
| indet.   |     |      |     | 18.4 |      |     | 18.4 |     |      |      |      |     | 2.4 | 2.4 | 0.6 |
| Total    | 2.8 | 9.5  | 1.2 | 8.4  | 12.8 | 1.1 | 5.8  | 4.0 | 16.7 | 30.0 | 16.7 | 2.4 | 3.6 | 2.9 | 0.6 |

## 8. Supplementary Tables S12–S18. Biometric Analysis

### Supplementary Table S12. Biometric estimation for *Bos Taurus*. Measurements in mm according nomenclature of Driesch (1976)

Ref: Driesch - 1976 A Guide To The Measurement of Animal Bones From Archaeological Site

| Animal            | Bone    | GL  | DP | BP | DD | BD |
|-------------------|---------|-----|----|----|----|----|
| <i>Bos taurus</i> | Humerus | 0   | 35 | 61 | 0  |    |
| <i>Bos taurus</i> | Humerus | 0   | 0  | 0  | 60 | 59 |
| <i>Bos taurus</i> | Humerus |     |    |    |    | 71 |
| <i>Bos taurus</i> | Radio   | 0   | 41 | 82 | 0  |    |
| <i>Bos taurus</i> | Radio   | 0   | 39 | 78 | 0  |    |
| <i>Bos taurus</i> | Radio   | 0   | 36 | 67 |    |    |
| <i>Bos taurus</i> | Radio   | 0   | 36 | 37 | 0  |    |
| <i>Bos taurus</i> | Radio   | 0   | 35 | 67 | 0  |    |
| <i>Bos taurus</i> | Radio   | 0   | 35 | 61 | 0  |    |
| <i>Bos taurus</i> | Radio   | 0   | 35 | 61 | 0  |    |
| <i>Bos taurus</i> | Radio   | 0   | 33 | 67 | 0  |    |
| <i>Bos taurus</i> | Radio   | 0   | 32 | 66 |    |    |
| <i>Bos taurus</i> | Radio   | 0   | 30 | 67 | 0  |    |
| <i>Bos taurus</i> | Radio   | 0   | 30 | 65 | 0  |    |
| <i>Bos taurus</i> | Radio   | 0   | 30 | 62 | 0  |    |
| <i>Bos taurus</i> | Radio   | 0   | 27 | 49 | 0  |    |
| <i>Bos taurus</i> | Radio   | 0   | 22 | 68 | 0  |    |
| <i>Bos taurus</i> | Radio   | 0   | 40 | 0  | 0  |    |
| <i>Bos taurus</i> | Radio   | 0   | 36 |    | 0  |    |
| <i>Bos taurus</i> | Radio   | 0   | 0  | 60 | 0  |    |
| <i>Bos taurus</i> | Radio   | 0   | 0  | 0  | 37 | 62 |
| <i>Bos taurus</i> | Radio   | 0   | 0  | 0  | 36 | 52 |
| <i>Bos taurus</i> | Radio   | 0   | 0  | 0  | 34 | 58 |
| <i>Bos taurus</i> | Femur   | 262 |    |    |    |    |
| <i>Bos taurus</i> | Tibia   | 0   | 0  | 0  | 37 | 64 |
| <i>Bos taurus</i> | Tibia   | 0   | 0  | 0  | 36 | 52 |
| <i>Bos taurus</i> | Tibia   | 0   | 0  | 0  | 36 | 58 |
| <i>Bos taurus</i> | Tibia   | 367 | 0  | 0  | 48 | 65 |
| <i>Bos taurus</i> | Tibia   | 330 | 75 | 81 | 40 | 60 |
| <i>Bos taurus</i> | Tibia   | 235 |    |    | 76 | 48 |
| <i>Bos taurus</i> | Tibia   | 235 |    |    | 76 | 48 |
| <i>Bos taurus</i> | Tibia   | 0   | 0  | 0  | 46 |    |
| <i>Bos taurus</i> | Tibia   | 0   | 0  | 0  | 43 |    |
| <i>Bos taurus</i> | Tibia   | 0   | 0  | 0  | 41 |    |
| <i>Bos taurus</i> | Tibia   | 0   | 0  | 0  | 41 |    |
| <i>Bos taurus</i> | Tibia   | 0   | 0  | 0  | 40 |    |
| <i>Bos taurus</i> | Tibia   | 0   | 0  | 0  | 40 |    |
| <i>Bos taurus</i> | Tibia   | 0   | 0  | 0  | 36 |    |
| <i>Bos taurus</i> | Tibia   | 0   | 0  | 0  | 33 |    |
| <i>Bos taurus</i> | Tibia   | 0   | 0  | 0  | 33 |    |
| <i>Bos taurus</i> | Tibia   | 0   | 0  | 0  | 25 |    |

|                   |            |     |    |    |    |    |
|-------------------|------------|-----|----|----|----|----|
| <i>Bos taurus</i> | Tibia      | 0   | 35 | 61 |    |    |
| <i>Bos taurus</i> | Tibia      | 0   | 32 | 44 |    |    |
| <i>Bos taurus</i> | Patella    | 60  |    |    |    |    |
| <i>Bos taurus</i> | Patella    | 46  |    |    |    |    |
| <i>Bos taurus</i> | Talus      | 63  |    |    |    |    |
| <i>Bos taurus</i> | Talus      | 62  |    |    |    |    |
| <i>Bos taurus</i> | Talus      | 62  |    |    |    |    |
| <i>Bos taurus</i> | Talus      | 61  |    |    |    |    |
| <i>Bos taurus</i> | Talus      | 60  |    |    |    |    |
| <i>Bos taurus</i> | Talus      | 60  |    |    |    |    |
| <i>Bos taurus</i> | Talus      | 60  |    |    |    |    |
| <i>Bos taurus</i> | Talus      | 60  |    |    |    |    |
| <i>Bos taurus</i> | Talus      | 60  |    |    |    |    |
| <i>Bos taurus</i> | Talus      | 57  |    |    |    |    |
| <i>Bos taurus</i> | Talus      | 57  |    |    |    |    |
| <i>Bos taurus</i> | Talus      | 55  |    |    |    |    |
| <i>Bos taurus</i> | Talus      | 53  |    |    |    |    |
| <i>Bos taurus</i> | Calcaneous | 135 |    |    |    |    |
| <i>Bos taurus</i> | Metacarpal | 207 | 33 | 55 | 31 | 58 |
| <i>Bos taurus</i> | Metacarpal | 0   | 35 | 54 | 0  |    |
| <i>Bos taurus</i> | Metacarpal | 0   | 34 | 55 | 31 |    |
| <i>Bos taurus</i> | Metacarpal | 0   | 30 | 51 | 0  |    |
| <i>Bos taurus</i> | Metacarpal | 0   | 30 | 51 | 0  |    |
| <i>Bos taurus</i> | Metacarpal | 0   | 30 | 46 | 0  |    |
| <i>Bos taurus</i> | Metacarpal | 0   | 27 | 50 |    |    |
| <i>Bos taurus</i> | Metacarpal | 0   | 25 | 42 | 0  |    |
| <i>Bos taurus</i> | Metacarpal | 0   | 23 | 47 |    |    |
| <i>Bos taurus</i> | Metacarpal | 0   | 21 | 45 | 0  |    |
| <i>Bos taurus</i> | Metacarpal | 0   | 0  | 0  | 36 |    |
| <i>Bos taurus</i> | Metacarpal | 0   | 0  | 0  | 29 |    |
| <i>Bos taurus</i> | Metacarpal | 0   | 0  | 0  | 29 |    |
| <i>Bos taurus</i> | Metacarpal | 0   | 0  | 0  | 23 |    |
| <i>Bos taurus</i> | Metatarsal | 214 | 40 | 41 | 25 | 50 |
| <i>Bos taurus</i> | Metatarsal | 0   | 49 | 50 | 0  |    |
| <i>Bos taurus</i> | Metatarsal | 0   | 44 | 41 |    |    |
| <i>Bos taurus</i> | Metatarsal | 0   | 0  | 0  | 40 |    |
| <i>Bos taurus</i> | Metatarsal | 0   | 0  | 0  | 40 |    |
| <i>Bos taurus</i> | Metatarsal | 0   | 0  | 0  | 24 |    |
| <i>Bos taurus</i> | Phalange 1 | 65  | 35 | 28 | 0  | 0  |
| <i>Bos taurus</i> | Phalange 1 | 61  |    |    | 0  | 0  |
| <i>Bos taurus</i> | Phalange 1 | 60  | 38 | 31 | 24 | 32 |
| <i>Bos taurus</i> | Phalange 1 | 60  | 35 | 30 | 20 | 29 |
| <i>Bos taurus</i> | Phalange 1 | 60  | 31 | 27 | 16 | 25 |
| <i>Bos taurus</i> | Phalange 1 | 59  | 34 | 32 | 0  | 0  |
| <i>Bos taurus</i> | Phalange 1 | 59  | 31 | 27 | 0  | 0  |
| <i>Bos taurus</i> | Phalange 1 | 58  | 30 | 27 | 20 | 25 |
| <i>Bos taurus</i> | Phalange 1 | 58  |    |    |    |    |
| <i>Bos taurus</i> | Phalange 1 | 58  |    |    |    |    |

|                   |            |    |    |    |    |    |
|-------------------|------------|----|----|----|----|----|
| <i>Bos taurus</i> | Phalange 1 | 56 | 33 | 23 | 20 | 26 |
| <i>Bos taurus</i> | Phalange 1 | 55 | 35 | 30 | 19 | 30 |
| <i>Bos taurus</i> | Phalange 1 | 55 | 30 | 27 | 17 | 27 |
| <i>Bos taurus</i> | Phalange 1 | 55 | 30 | 18 | 26 | 23 |
| <i>Bos taurus</i> | Phalange 1 | 55 | 28 | 25 | 15 | 23 |
| <i>Bos taurus</i> | Phalange 1 | 54 | 0  | 0  | 0  | 0  |
| <i>Bos taurus</i> | Phalange 1 | 52 | 30 | 26 | 20 | 33 |
| <i>Bos taurus</i> | Phalange 1 | 52 | 26 | 24 | 0  | 22 |
| <i>Bos taurus</i> | Phalange 1 | 52 | 0  | 0  | 0  | 0  |
| <i>Bos taurus</i> | Phalange 1 | 50 | 29 | 24 | 16 | 20 |
| <i>Bos taurus</i> | Phalange 1 | 50 | 26 | 24 | 16 | 21 |
| <i>Bos taurus</i> | Phalange 1 | 50 | 25 | 25 | 17 | 24 |
| <i>Bos taurus</i> | Phalange 1 | 50 | 25 | 23 | 25 | 20 |
| <i>Bos taurus</i> | Phalange 1 | 50 | 25 | 17 | 22 | 22 |
| <i>Bos taurus</i> | Phalange 2 | 41 | 33 | 30 | 30 | 27 |
| <i>Bos taurus</i> | Phalange 2 | 40 | 30 | 27 | 30 | 24 |
| <i>Bos taurus</i> | Phalange 2 | 37 | 30 | 26 | 26 | 22 |
| <i>Bos taurus</i> | Phalange 2 | 37 | 27 | 27 | 27 | 23 |
| <i>Bos taurus</i> | Phalange 2 | 36 | 31 | 28 | 30 | 23 |
| <i>Bos taurus</i> | Phalange 2 | 36 | 25 | 24 | 30 | 24 |
| <i>Bos taurus</i> | Phalange 2 | 35 | 30 | 29 | 30 | 24 |
| <i>Bos taurus</i> | Phalange 2 | 35 | 30 | 21 | 25 | 22 |
| <i>Bos taurus</i> | Phalange 2 | 35 | 29 | 28 | 23 | 23 |
| <i>Bos taurus</i> | Phalange 2 | 33 | 27 | 25 | 26 | 22 |
| <i>Bos taurus</i> | Phalange 2 | 32 | 28 | 25 | 24 | 22 |
| <i>Bos taurus</i> | Phalange 2 | 31 | 24 | 20 | 20 | 18 |
| <i>Bos taurus</i> | Phalange 2 | 30 | 26 | 21 | 22 | 18 |
| <i>Bos taurus</i> | Phalange 2 | 30 | 25 | 23 | 15 | 19 |
| <i>Bos taurus</i> | Phalange 2 | 30 | 24 | 22 | 20 | 19 |
| <i>Bos taurus</i> | Phalange 2 | 30 | 0  | 0  | 0  | 0  |
| <i>Bos taurus</i> | Phalange 3 | 65 |    |    |    |    |
| <i>Bos taurus</i> | Phalange 3 | 64 |    |    |    |    |
| <i>Bos taurus</i> | Phalange 3 | 63 |    |    |    |    |
| <i>Bos taurus</i> | Phalange 3 | 62 |    |    |    |    |
| <i>Bos taurus</i> | Phalange 3 | 60 |    |    |    |    |
| <i>Bos taurus</i> | Phalange 3 | 59 |    |    |    |    |
| <i>Bos taurus</i> | Phalange 3 | 57 |    |    |    |    |

**Supplementary Table S13. Estimated height at withers based on complete long bones**

| <i>Bos taurus</i> |     |                      |
|-------------------|-----|----------------------|
| Bone              | GL  | Estimated heigh (cm) |
| Femur             | 262 | 116.9                |
| Tibia             | 367 | 126.6                |
| Tibia             | 330 | 113.8                |
| Metacarpal        | 207 | 129.3 (Ox)           |
| Metatarsal        | 214 | 118.7                |

**Supplementary Table S14. Biometric estimation for or *Sus domesticus* and *Sus scrofa*. Measurements in mm according nomenclature of Driesh (1976).**

| Animal         | Bone       | GL  | DP | BP | DD | BD | Estimated height (cm) |
|----------------|------------|-----|----|----|----|----|-----------------------|
| Sus scrofa     | Talus      | 50  | 0  | 0  | 0  | 0  | +75                   |
| Sus scrofa     | Talus      | 40  | 0  | 0  | 0  | 0  | 74                    |
| Sus scrofa     | Radio      | 0   | 21 | 30 | 0  | 0  |                       |
| Sus scrofa     | Tibia      | 0   | 0  | 0  | 24 | 29 |                       |
| Sus domesticus | Tibia      | 167 | 30 | 35 | 20 | 27 |                       |
| Sus domesticus | Radio      | 120 | 15 | 22 | 20 | 25 | -70 cm                |
| Sus domesticus | Radio      | 115 |    |    | 0  | 0  | < 73 cm               |
| Sus domesticus | Calcaneous | 62  |    |    |    |    | 62 cm                 |
| Sus domesticus | Talus      | 40  | 0  | 0  | 0  | 0  | 74 cm                 |
| Sus domesticus | Patella    | 30  |    |    |    |    |                       |
| Sus domesticus | Radio      | 0   | 17 | 24 | 0  | 0  |                       |
| Sus domesticus | Humerus    | 0   | 0  | 0  | 35 | 29 |                       |
| Sus domesticus | Tibia      | 0   | 0  | 0  | 17 | 22 |                       |

**Supplementary Table S15. Biometric estimation for *Equus ferus*. Measurements in mm according nomenclature of Driesh (1976).**

| Animal             | Bone       | GL | DP | BP | DD | BD |
|--------------------|------------|----|----|----|----|----|
| <i>Equus ferus</i> | Phalange 1 | 65 | 0  | 0  | 0  | 0  |
| <i>Equus ferus</i> | Phalange 1 | 50 | 0  | 0  | 0  | 0  |
| <i>Equus ferus</i> | Phalange 2 | 42 | 35 | 23 | 45 | 41 |
| <i>Equus ferus</i> | Femur      | 0  | 27 | 50 |    |    |
| <i>Equus ferus</i> | Tibia      | 0  | 0  | 0  | 45 | 65 |
| <i>Equus ferus</i> | Tibia      | 0  | 0  | 0  | 44 | 62 |
| <i>Equus ferus</i> | Radio      | 0  | 0  | 0  | 33 | 55 |

**Supplementary Table S16. Biometric estimation for *Canis familiaris*. Measurements in mm according nomenclature of Driesh (1976).**

| Bone  | GL  | DP | BP | DD | BD | Estimated height (cm) |
|-------|-----|----|----|----|----|-----------------------|
| Tibia | 0   | 0  | 0  | 15 | 20 |                       |
| Tibia | 0   | 0  | 0  | 15 | 20 |                       |
| Tibia | 159 | 24 | 20 | 12 | 15 | 46.4 cm               |
| Fémur | 150 |    |    | 23 | 20 | 45.1cm                |



|        |     |    |    |    |    |         |
|--------|-----|----|----|----|----|---------|
| Húmero | 134 | 26 | 18 | 20 | 20 | 45.1 cm |
|--------|-----|----|----|----|----|---------|

**Supplementary Table S17. Biometric estimation for *Capra pyrenaica* and *Capra hircus*. Measurements in mm according nomenclature of Driesh (1976).**

| Animal                 | Bone       | GL  | DP | BP | DD | BD | Estimated height (cm) |
|------------------------|------------|-----|----|----|----|----|-----------------------|
| <i>Capra pyrenaica</i> | Radio      | 150 | 28 | 44 |    |    | 59.7                  |
| <i>Capra pyrenaica</i> | Metacarpal | 140 | 21 | 35 |    |    | 72.1                  |
| <i>Capra hircus</i>    | Tibia      | 204 | 40 | 35 | 17 | 21 | 60.5                  |
| <i>Capra hircus</i>    | Femur      | 174 | 20 | 37 | 40 | 35 | 59.2                  |
| <i>Capra hircus</i>    | Humerus    | 161 | 40 | 36 | 24 | 28 | 62.1                  |
| <i>Capra hircus</i>    | Radio      | 150 | 11 | 25 | 16 | 26 | 59.7                  |
| <i>Capra hircus</i>    | Metatarsal | 116 | 14 | 17 | 13 | 21 | 61.9                  |
| <i>Capra hircus</i>    | Metacarpal | 105 | 16 | 20 | 15 | 24 | 60.3                  |
| <i>Capra hircus</i>    | Calcaneous | 47  | 0  | 0  | 0  | 0  |                       |
| <i>Capra hircus</i>    | Talus      | 25  |    |    |    |    |                       |
| <i>Capra hircus</i>    | Humerus    | 0   | 20 | 25 | 0  | 0  |                       |
| <i>Capra hircus</i>    | Metatarsal | 0   | 19 | 19 | 0  | 0  |                       |
| <i>Capra hircus</i>    | Radio      | 0   | 15 | 23 | 0  | 0  |                       |
| <i>Capra hircus</i>    | Radio      | 0   | 14 | 26 | 0  | 0  |                       |
| <i>Capra hircus</i>    | Radio      | 0   | 14 | 26 | 0  | 0  |                       |
| <i>Capra hircus</i>    | Radio      | 0   | 12 | 25 | 0  | 0  |                       |
| <i>Capra hircus</i>    | Radio      | 0   | 12 | 24 | 0  | 0  |                       |
| <i>Capra hircus</i>    | Humerus    | 0   | 0  | 0  | 21 | 25 |                       |
| <i>Capra hircus</i>    | Humerus    | 0   | 0  | 0  | 21 | 25 |                       |
| <i>Capra hircus</i>    | Radio      | 0   | 0  | 0  | 16 | 23 |                       |
| <i>Capra hircus</i>    | Metatarsal | 0   | 0  | 0  | 15 | 23 |                       |

**Supplementary Table S18. Biometric estimation for *Ovis aries*. Measurements in mm according nomenclature of Driesh (1976).**

| Animal            | Bone       | GL | DP | BP | DD | BD |
|-------------------|------------|----|----|----|----|----|
| <i>Ovis aries</i> | Talus      | 30 | 0  | 0  | 0  | 0  |
| <i>Ovis aries</i> | Tibia      | 0  | 0  | 0  | 16 | 22 |
| <i>Ovis aries</i> | Metacarpal | 0  | 0  | 0  | 0  | 21 |
| Ovis / Capra      | Tibia      | 0  | 17 | 24 |    |    |

|                 |            |   |   |   |    |    |
|-----------------|------------|---|---|---|----|----|
| Ovis /<br>Capra | Tibia      | 0 | 0 | 0 | 18 | 24 |
| Ovis /<br>Capra | Tibia      | 0 | 0 | 0 | 18 | 22 |
| Ovis /<br>Capra | Tibia      | 0 | 0 | 0 | 18 | 21 |
| Ovis /<br>Capra | Humerus    | 0 | 0 | 0 | 16 | 23 |
| Ovis /<br>Capra | Metacarpal | 0 | 0 | 0 | 14 | 21 |
| Ovis /<br>Capra | Metatarsal | 0 | 0 | 0 | 12 | 22 |
| Ovis /<br>Capra | Metatarsal | 0 | 0 | 0 | 12 | 22 |

### Supplementary Data S1. Bayesian Age Model.

Plot()

```
{
  Curve("IntCal20","intcal20.14c");
  Outlier_Model("General",T(5),U(0,4),"t");
  Sequence()
  {
    Boundary("Start Bell Beaker");
    Phase("Bell Beaker")
    {
      R_Date("SU1251",3768,31)
      {
        Outlier("General",0.05);
      };
      R_Date("SU2417",3764,25)
      {
        Outlier("General",0.05);
      };
    }
  }
}
```

```
};  
};  
Boundary("End Bell Beaker");  
Boundary("Start Middle Bronze Age");  
Phase("Middle Bronze Age")  
{  
  R_Date("SU962",3269,21)  
  {  
    Outlier("General",0.05);  
  };  
  R_Date("SU2581",3161,27)  
  {  
    Outlier("General",0.05);  
  };  
  R_Date("SU1660",3090,24)  
  {  
    Outlier("General",0.05);  
  };  
};  
Boundary("End Middle Bronze Age");  
};  
};
```
